# Supplementary material for: Warming, euxinia and sea level rise during the Paleocene–Eocene Thermal Maximum on the Gulf Coastal Plain: implications for ocean oxygenation and nutrient cycling
Source: Copernicus journal article supplement (doi:10.5194/cp-10-1421-2014), 2014-07-25
Supplement: Supplementary file 1 [file cp-10-1421-2014-supplement.zip]

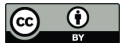

## *Supplement of*

# **Warming, euxinia and sea level rise during the Paleocene–Eocene Thermal Maximum on the Gulf Coastal Plain: implications for ocean oxygenation and nutrient cycling**

**A. Sluijs et al.**

*Correspondence to:* A. Sluijs (a.sluijs@uu.nl)

- Supplement-Cover-Letter.pdf
- Supplementary Materials REV-format.pdf
- Table S1. Harrell Data.xlsx
- Table S2. PETM data compilation.xlsx
- \_\_MACOSX
  - .\_Supplementary Materials REV-format.pdf
  - .\_Table S1. Harrell Data.xlsx
  - .\_Table S2. PETM data compilation.xlsx
