# Supplementary material for: Warming, euxinia and sea level rise during the Paleocene–Eocene Thermal Maximum on the Gulf Coastal Plain: implications for ocean oxygenation and nutrient cycling
Source: Copernicus journal article supplement (doi:10.5194/cp-10-1421-2014), 2014-07-25
Supplement: Supplementary file 1 [file Table S1. Harrell Data.xlsx]

## Sheet: Calcareous nannofossil results
Calcareous nannofossil results
Nannofossil results across the Paleocene-Eocene transition in the Harrell Core. Samples were only productive for the samples taken from the Bashi fossiliferous beds.
Note that sample depths within the Bashi were extrapolated due to core recovery problems (in reds).
	Formation / Member and lithostratigraphic remarks	Harrell Box	feet	inches	meters	age	Nannofossil Abundance	Braarudosphaera bigelowii	Chiasmolithus solitus	Coccolithus pelagicus	Discoaster multiradiatus	Fasciculithus spp.	Micrantholithus entaster	Neochiastozygus distentus	Neochiastozygus junctus	Pontosphaera spp.	Prinsius martinii	Prinsius spp.	Sphenolithus primus	Toweius crassus	Toweius eminens	Toweius pertusus	Toweius rotundus	Transversopontis pulcheroides	Transversopontis spp.	Zygodiscus bramlettei	Zygrhablithus bijugatus
	Bashi calcareous fossiliferous bed	27	372	-22.5	112.814	eoc	Barren
	Bashi calcareous fossiliferous bed	27	372	-15	113.005	eoc	Rare				x		x				x		x	x		x	x	x	x	x
	Bashi calcareous fossiliferous bed	27	372	-7.5	113.195	eoc	Rare		x	x	x			x	x	x	x		x	x	x		x	x		x	x
	Bashi calcareous fossiliferous bed	27	372		113.386	eoc	Rare	x		x	x	x	x	x				x		x			x			x	x
	Hatchetigbee Fm; Bashi Mb	28	378	7	115.392	eoc	Barren
	Hatchetigbee Fm; Bashi Mb	28	379	5.5	115.659	eoc	Barren
	Hatchetigbee Fm; Bashi Mb	28	380	11.5	116.116	eoc	Barren
	Hatchetigbee Fm; Bashi Mb	28	384	5	117.17	eoc	Barren
	Hatchetigbee Fm; Bashi Mb	29	386	0	117.653	eoc	Barren
	Hatchetigbee Fm; Bashi Mb	29	386	6	117.805	eoc	Barren
	Hatchetigbee Fm; Bashi Mb	29	387	8	118.161	eoc	Barren
	Hatchetigbee Fm; Bashi Mb	29	389	1	118.593	eoc	Barren
	Tuscahoma Fm	29	390	1	118.897	petm	Barren
	Tuscahoma Fm	29	392	3	119.558	petm	Barren
	Tuscahoma Fm	29	393	2	119.837	petm	Barren
	Tuscahoma Fm	29	394	7	120.269	petm	Barren
	Tuscahoma Fm	29	395	8	120.599	petm	Barren
	Tuscahoma Fm	30	397	10	121.26	petm	Barren
	Tuscahoma Fm	30	398	9	121.539	petm	Barren
	Tuscahoma Fm	30	400	10	122.174	pal	Barren
	Tuscahoma Fm	30	403	0	122.834	pal	Barren
	Tuscahoma Fm	31	404	5	123.266	pal	Barren
	Tuscahoma Fm	31	405	6	123.596	pal	Barren
	Tuscahoma Fm	31	406	7	123.927	pal	Barren
	Tuscahoma Fm	31	407	8	124.257	pal	Barren
	Tuscahoma Fm	31	408	9	124.587	pal	Barren
	Tuscahoma Fm	31	410	9	125.197	pal	Barren
	Tuscahoma Fm	31	412	5	125.705	pal	Barren
	Tuscahoma Fm	32	414	6	126.34	pal	Barren
	Tuscahoma Fm	32	416	5	126.924	pal	Barren
	Tuscahoma Fm	32	418	6	127.559	pal	Barren
	Tuscahoma Fm	32	420	5	128.143	pal	Barren
	Tuscahoma Fm	32	421	10	128.575	pal	Barren

## Sheet: Overall paly and dinocysts
General palynology and dinocyst results nq = non quantifiable num = numerous p = present Percentages of dinoflagelallate cysts are calculated relative to the total dinocyst count Percentages of terrestrial palynomorphs are calculated relative to the total palynological counts	code	mbs	epoch	dinocysts per gram	n Apectodinium spp.	n Areoligera cpx sensu Sluijs and Brinkhuis 2009	n Diphyes spp.	n Goniodomidae	n Spiniferites cpx. sensu Sluijs and Brinkhuis, 2009	n Senegalinium cpx. sensu Sluijs and Brinkhuis, 2009	n Cordosphaeridium cpx. sensu Sluijs and Brinkhuis, 2009	n Operculodinium spp.	n terrestrial palmorphs	n Pediastum spp.	n foraminifer lining		% Apectodinium spp.	% n Areoligera cpx sensu Sluijs and Brinkhuis 2009	% Diphyes spp.	% Goniodomidae	% Spiniferites cpx. sensu Sluijs and Brinkhuis, 2009	% Senegalinium cpx. sensu Sluijs and Brinkhuis, 2009	% Cordosphaeridium cpx. sensu Sluijs and Brinkhuis, 2009	% Operculodinium spp.	% rest	% dinocysts	% terrestrial palynomorphs	% other
	HC095	117.551	eoc	3262.44	126	20	3	1	5	3	29	11	302		2		63	10	1.5	0.5	2.5	1.5	14.5	5.5	1	38.835	58.6408	2.52427
	HC085	118.567	eoc	nq	9	1	0	0	1	0	2	0	0		r		69.2308	7.69231	0	0	7.69231	0	15.3846	0	0	nq	nq	nq
	HC076	119.482	eoc	7633.23	126	13	24	0	18	8	9	0	95		8		61.7647	6.37255	11.7647	0	8.82353	3.92157	4.41176	0	2.94118	65.8065	30.6452	3.54839
	HC064	120.091	eoc	24854.9	204	36	3	0	1	2	11	0	22		2		78.1609	13.7931	1.14943	0	0.383142	0.766284	4.21456	0	1.53257	90.9408	7.66551	1.39373
	HC056	120.498	eoc	335.186	23	0	0	0	3	0	2	0	73		5		82.1429	0	0	0	10.7143	0	7.14286	0	0	25.9259	67.5926	6.48148
	HC048	120.904	eoc	19825.6	175	16	45	0	8	1	2	0	28				69.17	6.32411	17.7866	0	3.16206	0.395257	0.790514	0	2.37154	90.0356	9.96441	0
	HC042	121.209	eoc	41945.1	176	20	20	0	7	0	0	0	24				77.193	8.77193	8.77193	0	3.07018	0	0	0	2.19298	89.7638	9.44882	0.787402
	HC038	121.412	eoc	33777.8	186	13	38	0	7	0	0	1	24		2		75.9184	5.30612	15.5102	0	2.85714	0	0	0.408163	0	90.4059	8.85609	0.738007
	HC034	121.615	eoc	53223	202	22	15	0	12	7	6	2	24		2		73.9927	8.05861	5.49451	0	4.3956	2.5641	2.1978	0.732601	2.5641	91.3043	8.02676	0.668896
	HC030	121.818	eoc	19666.6	231	10	13	1	2	2	10	2	39		4		84	3.63636	4.72727	0.363636	0.727273	0.727273	3.63636	0.727273	1.45455	84.6154	12	3.38462
	HC029	121.869	eoc	4093.49	172	7	9	0	12	1	2	1	488	2			84.3137	3.43137	4.41176	0	5.88235	0.490196	0.980392	0.490196	0	20.6731	78.2051	1.12179
	HC028	121.92	pal	469.91	8	1	0	1	2	3	6	0	518				33.3333	4.16667	0	4.16667	8.33333	12.5	25	0	12.5	2.06767	97.3684	0.56391
	HC026	122.022	pal	300.334	6	2	0	0	2	0	8	0	348	2			30	10	0	0	10	0	40	0	10	2.48619	96.1326	1.38122
	HC024	122.123	pal	nq	1	1	0	1	1	1	5	4	num	1			5.88235	5.88235	0	5.88235	5.88235	5.88235	29.4118	23.5294	17.6471	<2	>98	nq
	HC022	122.225	pal	nq	16	9	0	2	2	13	4	2	num	1	p		28.5714	16.0714	0	3.57143	3.57143	23.2143	7.14286	3.57143	14.2857	<2	>98	nq
	HC020	122.326	pal	nq	6	3	0	1	0	11	2	4	num	5			20.6897	10.3448	0	3.44828	0	37.931	6.89655	13.7931	6.89655	<2	>98	nq
	HC018	122.428	pal	nq	3	1	1	0	1	1	2	2	num	1			27.2727	9.09091	9.09091	0	9.09091	9.09091	18.1818	18.1818	0	<2	>98	nq
	HC016	122.53	pal	nq	8	0	0	0	1	5	5	2	num		p		32	0	0	0	4	20	20	8	16	<2	>98	nq
	HC014	122.733	pal	nq	10	1	0	0	3	5	1	3	num		p		34.4828	3.44828	0	0	10.3448	17.2414	3.44828	10.3448	20.6897	<2	>98	nq
	HC010	123.139	pal	303.565	3	0	0	1	1	7	2	1	1002		2		17.6471	0	0	5.88235	5.88235	41.1765	11.7647	5.88235	11.7647	1.66016	97.8516	0.488281
	HC001	124.054	pal	321.387	3	0	0	0	0	2	3	1	465	1			30	0	0	0	0	20	30	10	10	2.09644	97.4843	0.419287
	SUM of pre-CIE assemblages				64	18	1	6	13	48	38	19					26.8908	7.56303	0.420168	2.52101	5.46218	20.1681	15.9664	7.98319	13.0252

## Sheet: Pollen and spores
Pollen and spore occurrence in the upper Tuscahoma Fm. Taxa occurrences are plotted in rows against sample meter levels. Numbers indicate counted specimens. Note that for both Caryapollenites and Momipites the individual form-species are presented and the sum of all these form-species is also presented in a seperate row. Previously unpublished data points are indicated in red. Remaining samples a…
	Meter levels
Taxa	170.739	166.802	164.44	163.83	162.966	162.611	161.392	161.087	158.953	158.344	157.81	157.048	156.515	155.905	155.296	154.686	154.076	153.467	152.857	152.552	152.248	151.943	151.587	151.333	149.276	148.463	148.285	147.955	145.542	145.237	144.932	144.628	143.408	143.18	142.85	142.138	141.884	141.478	141.122	140.538	139.522	138.43	137.795	137.668	137.236	136.703	135.407	135.179	134.849
Spores
Aneamia	0	0	0	0	0	0	0	0	0	0	1	1	0	0	0	0	0	0	0	0	0	1	0	0	0	0	0	0	0	0	0	0	1	1	0	0	0	0	0	0	0	0	0	0	0	0	1	0	0
Baculate spore (monolet)	0	0	0	0	0	0	0	0	0	0	0	0	0	0	0	0	0	0	0	0	0	0	0	0	0	0	0	0	0	0	0	0	0	0	0	0	0	0	0	0	0	0	0	0	0	0	0	0	0
Baculatisporites primarius	0	4	3	1	4	2	2	1	1	6	2	1	0	3	2	1	1	4	7	0	5	3	2	3	2	1	3	1	5	1	2	2	3	3	1	5	9	5	2	3	4	2	4	4	8	3	1	6	4
Camarozonosporites sp.	2	0	0	0	0	0	0	1	0	2	0	0	0	0	0	0	1	2	2	0	2	0	2	0	0	1	0	0	0	0	0	1	1	0	0	0	0	0	0	0	0	0	0	0	0	0	0	0	0
Cicatricosisporites dorogensis	2	10	3	8	16	7	8	7	11	7	6	8	5	6	6	7	6	11	10	7	7	12	8	5	10	11	8	0	30	11	4	7	8	9	8	7	12	6	15	5	9	4	10	11	12	7	11	9	13
Cicatricosisporites sp 1	0	1	0	1	0	0	2	1	0	0	1	1	1	1	1	0	0	0	2	0	0	0	0	1	3	1	0	2	0	1	2	0	0	0	6	0	1	1	4	1	0	2	1	1	0	1	0	1	1
Cicatricososporites sp.	0	0	0	0	1	0	0	0	0	0	0	0	0	0	0	0	0	0	0	0	0	0	0	0	0	0	0	0	0	0	0	0	0	0	0	0	0	0	0	0	0	0	0	0	0	0	0	0	0
Cingulatisporites	0	0	0	0	0	0	0	0	0	0	1	0	0	1	0	0	0	0	0	0	0	0	0	0	0	0	0	0	0	0	0	0	0	0	0	0	0	0	0	0	0	0	0	0	0	0	0	0	0
Deltoidaspora spp. Undiff.	17	22	34	35	38	31	40	42	40	25	28	30	25	33	26	18	33	26	43	27	18	48	12	39	34	47	15	57	56	13	76	73	37	29	17	41	42	42	37	51	29	26	32	32	45	28	14	29	34
Gleichenidites sp.	0	0	0	0	0	1	0	0	0	0	0	0	0	0	0	0	0	0	0	0	0	0	0	0	0	0	0	0	0	0	0	0	0	0	0	0	0	0	0	0	0	0	0	0	0	0	0	0	0
Granulatisporites luteticus	0	0	0	0	0	0	0	0	0	0	0	0	0	0	0	0	0	0	0	0	0	0	0	0	0	0	0	0	0	0	0	0	0	0	0	0	0	1	0	0	0	0	0	0	0	0	0	0	0
Granulatisporites? Sp.	0	0	1	0	0	0	0	0	0	0	0	0	0	0	0	0	0	0	0	0	0	0	0	0	0	0	0	0	1	0	1	0	3	3	0	0	0	0	0	1	0	1	1	0	0	1	0	1	0
Laevigatosporites haardtii	54	33	40	56	45	33	51	34	48	25	55	30	30	40	48	21	42	26	34	37	31	51	21	53	61	62	53	141	33	37	59	58	40	50	38	31	50	47	36	55	45	44	29	45	65	50	19	35	43
Lycopodium? Sp.	0	0	2	1	1	0	1	1	0	0	0	0	1	1	0	0	0	0	1	2	0	0	0	0	0	0	0	0	0	0	0	0	0	0	0	0	0	1	0	0	0	0	0	1	0	0	2	0	0
Microfoveolatosporis pseudodentatus	0	1	0	0	0	0	0	1	1	0	1	2	0	1	1	0	2	0	0	1	3	0	1	0	0	3	1	2	5	0	1	2	1	0	1	0	0	1	2	0	0	0	3	0	1	1	0	0	2
Polypodium spp	0	0	1	0	1	0	1	0	0	0	0	0	0	1	0	0	1	0	0	0	0	0	0	0	0	0	1	2	0	0	0	0	1	2	0	0	1	0	0	1	0	0	2	0	1	2	3	1	3
Punctatisporites sp.	0	0	0	0	0	0	0	0	0	0	0	0	0	0	0	0	0	0	0	0	0	0	0	0	0	0	0	0	0	0	0	0	0	0	0	2	0	0	0	0	0	0	0	0	0	0	0	0	0
Punctatosporites sp.	0	0	0	0	0	0	0	0	0	0	0	0	0	1	0	0	0	0	0	0	0	0	0	0	0	0	0	0	0	0	0	0	0	0	0	0	0	1	0	1	0	0	1	0	0	0	0	0	0
Reticuloidospora	1	0	0	0	0	0	0	0	0	0	0	0	0	1	1	0	0	0	0	0	0	0	0	1	0	2	0	0	1	0	0	0	2	1	0	0	3	0	0	0	0	0	1	3	0	0	0	0	0
Stereisporites distgranisporis	0	1	0	0	0	0	0	0	0	0	0	0	0	0	0	0	0	0	0	0	0	0	0	0	0	0	0	0	0	0	0	0	0	0	0	0	0	0	0	0	0	0	0	0	0	0	0	0	0
Stereisporites stereiodes	3	3	0	3	2	0	0	1	0	1	0	1	1	0	0	1	0	0	2	0	0	0	0	0	0	1	2	0	0	0	3	3	0	0	2	2	1	0	1	0	0	0	1	0	0	1	0	0	0
Zlivosporis	0	0	0	0	1	1	0	0	1	1	0	0	0	0	1	1	0	0	0	1	0	0	1	0	0	0	0	0	0	0	0	0	0	1	0	1	0	1	0	0	0	0	2	0	0	0	1	2	0
Monocot pollen	0	0	0	0	0	0	0	0	0	0	0	0	0	0	0	0	0	0	0	0	0	0	0	0	0	0	0	0	0	0	0	0	0	0	0	0	0	0	0	0	0	0	0	0	0	0	0	0	0
Arecipites spp.	1	0	0	0	1	0	0	0	0	0	2	1	10	2	0	1	1	2	0	1	1	1	3	1	2	0	1	0	1	0	1	2	0	1	1	4	0	2	3	2	3	1	0	0	0	5	0	1	1
Calamuspollenites eocenicus	0	1	0	0	3	0	1	0	1	0	1	0	0	0	1	2	2	2	0	0	1	0	0	2	0	0	2	0	1	3	1	2	0	1	2	2	1	4	1	1	4	1	0	4	1	1	0	2	2
Confertisulcites?	1	1	2	1	1	0	0	2	1	1	0	0	0	1	1	0	2	0	1	0	0	1	0	1	0	1	0	1	0	0	0	1	0	4	0	0	1	0	0	0	2	0	0	0	0	0	2	1	1
Liliacidites spp.	2	0	1	0	2	1	2	0	0	0	1	0	1	0	0	2	0	0	1	0	1	1	0	0	3	0	0	0	1	1	5	4	2	1	2	2	1	0	1	1	0	1	1	1	2	1	3	3	1
Longapertites spp.	0	2	4	0	2	0	0	2	3	0	1	2	2	0	1	0	2	1	6	4	0	4	0	3	2	0	0	0	1	0	0	1	0	1	0	0	2	1	0	2	3	0	0	1	3	0	0	1	0
Milfordia minima	0	0	0	0	0	0	0	0	0	0	0	0	0	0	0	0	0	1	1	0	0	0	0	0	0	0	0	0	0	0	0	0	0	0	0	0	0	1	0	0	0	1	0	0	0	1	0	3	0
Milfordia sp. (big)	0	0	0	0	0	0	0	0	0	0	0	0	0	0	0	0	0	0	0	0	0	0	0	0	0	0	0	0	0	0	0	0	0	0	0	0	0	0	0	0	0	0	0	0	0	0	0	0	0
Monocolpopollenites tranquillus	1	0	0	0	0	0	1	0	1	0	0	1	0	1	1	0	0	0	0	0	0	1	0	0	0	0	0	0	1	1	1	0	0	2	0	0	0	1	0	1	0	0	0	0	0	1	2	0	0
Proxapertites magnus	0	4	1	1	3	0	1	2	1	2	3	2	2	0	0	0	1	3	2	3	0	2	0	2	1	0	0	0	4	0	1	0	4	1	0	2	2	1	0	0	0	0	4	1	3	1	0	3	2
Proxapertites operculatus	0	0	0	1	3	0	0	1	0	3	0	0	0	1	2	0	1	1	1	0	1	2	0	0	0	0	0	0	0	0	0	0	1	2	0	0	0	0	0	0	1	0	1	0	0	1	0	2	1
Proxapertites psilatus	0	3	1	3	1	0	2	0	1	0	3	2	0	1	1	0	0	4	2	1	0	1	0	2	4	0	0	0	4	0	1	4	2	2	0	1	2	0	0	1	2	0	1	0	1	3	0	0	1
Proxapertites spp.	0	2	2	0	3	0	2	4	2	4	1	2	1	0	3	0	1	3	2	1	0	2	0	2	1	0	0	0	0	0	1	0	0	4	0	0	2	1	0	0	0	0	0	1	3	2	0	2	1
Psilodioporites iszaskentgyorgyi	0	0	1	0	0	0	0	0	0	0	0	0	0	0	0	0	0	0	1	1	0	0	0	2	1	0	0	0	0	0	0	1	0	0	0	0	0	0	0	0	0	0	0	0	0	0	0	0	0
Sparganiaceae sp. A	1	1	1	0	0	0	0	1	0	0	0	3	2	1	0	0	0	0	1	2	0	1	1	0	0	0	1	0	2	0	8	5	3	4	0	1	0	0	0	0	1	4	0	0	1	0	0	3	0
Gymnosperms	0	0	0	0	0	0	0	0	0	0	0	0	0	0	0	0	0	0	0	0	0	0	0	0	0	0	0	0	0	0	0	0	0	0	0	0	0	0	0	0	0	0	0	0	0	0	0	0	0
Cycadopites follicularis	2	13	7	11	10	3	9	9	6	9	10	7	5	7	9	1	12	9	10	3	2	7	1	11	4	4	2	5	13	3	18	10	8	10	2	7	8	7	0	4	6	1	6	11	8	13	7	13	13
Bisaccate pollen (undiff.)	19	39	35	23	47	50	29	36	40	70	37	30	56	32	50	66	39	43	32	51	49	53	40	31	13	19	8	2	9	0	5	10	49	21	27	31	32	26	13	28	35	32	40	17	20	29	13	43	11
Taxodiaceae pollen (TCP undiff.)	57	52	51	24	55	55	68	68	70	69	42	78	82	71	56	73	65	75	62	97	68	43	75	51	24	21	13	3	23	24	35	20	69	59	44	64	45	54	68	39	43	59	91	70	60	51	79	42	71
Angiosperms	0	0	0	0	0	0	0	0	0	0	0	0	0	0	0	0	0	0	0	0	0	0	0	0	0	0	0	0	0	0	0	0	0	0	0	0	0	0	0	0	0	0	0	0	0	0	0	0	0
Aesculiidites circumstriatus	0	0	1	0	0	0	0	0	0	0	0	1	5	1	0	0	0	1	0	0	0	0	0	0	0	0	5	0	1	11	3	1	0	1	0	0	0	0	0	0	0	0	0	1	1	0	2	0	0
Ailanthipites berryi	0	0	0	0	0	0	0	0	0	0	0	1	1	0	0	0	0	0	0	0	0	1	0	0	0	0	0	0	0	0	1	0	0	0	0	0	0	0	0	0	0	0	0	0	0	0	0	0	0
Ailanthipites sp. A	0	0	0	0	0	0	0	0	0	0	0	0	0	0	0	0	0	0	0	0	0	0	0	0	0	0	0	0	0	0	0	0	0	0	0	0	0	0	0	0	0	0	0	0	0	0	0	0	0
Alnipollenites spp	0	0	1	1	0	0	1	0	0	0	0	1	1	1	2	0	0	1	0	0	1	0	0	0	0	0	0	0	0	0	0	0	0	0	0	1	0	0	0	1	0	0	1	0	3	0	1	0	1
Araliaceaipollenites megaporifera	0	0	0	0	0	0	0	0	0	0	0	0	0	0	0	0	0	0	0	0	0	0	0	0	0	0	0	0	0	0	0	0	0	0	0	0	0	0	0	0	0	0	0	0	0	0	0	0	0
Araliaceaipollenites profundus	0	0	0	0	0	0	0	0	0	0	0	0	0	0	0	0	0	0	0	0	0	0	0	0	0	0	0	0	0	0	0	0	0	0	0	0	0	0	0	0	0	0	0	0	0	0	0	0	0
Araliaceaipollenites spp.	0	0	0	0	0	0	0	0	0	0	0	0	0	0	0	0	1	0	0	0	0	0	1	0	0	0	0	0	0	0	0	0	0	0	0	0	0	1	0	0	0	0	0	0	0	0	2	0	0
Basopollis obscurocostatus	0	0	0	1	0	0	0	0	0	0	0	0	1	0	0	0	0	0	1	0	0	0	0	0	0	0	1	0	0	0	0	0	0	0	0	0	0	0	0	0	0	0	0	0	0	0	0	0	0
Betulaceae/Myricaceae types	167	218	108	154	148	137	112	93	104	105	145	111	101	124	128	127	121	95	141	109	108	116	143	167	230	210	257	180	184	227	224	243	103	84	130	103	109	88	95	130	94	93	87	72	109	80	102	90	100
Boehlensipollis minimus	0	1	0	0	0	0	0	0	0	0	0	0	0	0	0	0	0	0	0	0	0	0	0	0	0	0	0	0	0	1	0	0	0	0	0	0	0	0	0	0	0	0	0	0	0	0	0	0	0
Bombacadites reticulatus	0	0	0	0	0	0	0	0	1	0	0	0	0	0	0	0	0	0	0	0	0	0	0	0	0	0	0	0	0	0	0	0	0	0	0	0	0	0	0	0	0	0	0	0	0	0	0	0	0
Bombacadites spp. Undiff	0	0	0	0	0	0	0	0	0	0	0	0	0	1	0	0	0	0	0	0	0	0	0	0	0	0	0	0	0	0	0	0	0	0	0	0	0	0	0	0	0	0	0	0	0	0	0	0	0
Bombax nacimentoensis	0	0	0	0	0	0	0	0	0	0	0	0	0	0	0	0	0	0	0	0	0	0	0	0	0	0	0	0	0	0	0	0	0	0	1	0	0	0	0	0	0	0	0	0	0	0	0	0	0
Bombax paulus	0	0	0	0	0	0	0	0	0	0	0	0	0	0	0	0	0	0	0	0	0	0	0	0	0	0	0	0	0	0	0	0	0	0	0	0	0	0	0	0	0	0	1	0	0	0	0	0	0
Brosipollis spp.	0	0	0	0	0	0	0	0	0	0	0	0	0	0	0	0	0	0	0	0	0	0	0	0	0	0	0	0	0	0	0	0	0	0	0	0	0	0	0	0	0	0	0	0	0	0	0	0	0
Caprifoliipites incertigrandis	0	1	2	0	2	0	0	0	0	2	2	0	1	0	2	0	1	0	2	1	1	1	0	0	3	0	0	0	1	0	0	0	0	0	0	0	0	0	0	0	0	1	0	0	2	0	0	0	0
Caprifoliipites sp. (clavate)	0	0	0	0	0	2	1	1	0	0	0	0	0	0	0	1	0	0	0	0	0	0	0	0	0	0	0	0	0	0	0	0	0	0	0	0	0	0	0	0	0	0	0	0	0	0	0	0	0
Caprifoliipites sp. (small <10 mm)	0	0	0	0	0	0	0	0	0	0	0	0	0	0	0	0	0	0	0	0	0	0	0	0	0	0	1	0	0	0	0	0	0	0	0	0	0	0	0	0	0	0	0	0	0	0	0	0	0
Caprifoliipites spp. Undiff.	2	1	1	1	1	1	1	0	0	1	2	0	0	0	0	0	1	1	1	0	0	1	1	0	1	1	0	0	0	1	0	0	1	1	1	0	0	0	1	0	0	2	0	0	1	1	0	1	0
Caprifoliipites tantulus	0	0	0	0	0	1	0	0	0	0	0	0	0	0	0	0	0	0	0	0	0	0	0	0	0	1	0	0	0	0	0	0	0	0	1	0	0	0	0	0	0	0	0	0	0	1	0	0	0
Caryapollenites (big)	0	0	0	0	0	0	0	0	0	0	0	0	0	0	0	0	0	0	0	0	0	0	2	0	0	0	0	0	0	0	0	0	0	0	0	0	0	0	0	0	0	0	0	0	0	0	0	0	0
Caryapollenites all spp. (summed)	4	13	10	4	12	19	17	7	14	14	21	18	17	16	20	20	21	23	18	23	20	17	13	3	8	7	6	0	0	0	0	3	12	11	19	9	13	12	13	13	18	22	9	20	16	11	42	11	24
Caryapollenites imparalis	0	0	0	0	0	1	0	0	0	0	0	0	0	0	0	0	0	0	0	2	2	0	0	0	0	0	0	0	0	0	0	0	0	0	0	0	0	0	0	0	0	0	0	0	0	0	4	0	0
Caryapollenites spp. Undiff.	1	9	4	0	4	4	7	3	3	4	4	10	3	3	11	8	10	12	9	7	3	7	0	1	3	0	0	0	0	0	0	3	4	5	12	3	6	1	9	6	5	11	1	10	10	5	8	4	12
Caryapollenites veripites	3	3	6	4	7	14	8	3	8	9	16	7	11	13	7	11	9	11	8	14	15	10	11	2	4	7	6	0	0	0	0	0	6	6	7	5	6	10	4	6	12	11	8	9	6	5	30	7	12
Caryapollenites wodehousei	0	1	0	0	1	0	2	1	3	1	1	1	3	0	2	1	2	0	1	0	0	0	0	0	1	0	0	0	0	0	0	0	2	0	0	1	1	1	0	1	1	0	0	1	0	1	0	0	0
Celtispollenites spp. Undiff	0	0	0	0	0	0	0	0	0	0	0	0	0	0	0	0	0	0	0	0	0	0	0	0	0	0	0	0	0	0	0	0	0	0	0	1	2	0	0	0	1	0	0	2	0	0	0	0	0
Celtispollenites tschudyii	0	0	0	0	0	0	0	0	0	0	0	0	0	0	0	0	0	0	0	0	0	0	0	0	0	0	0	0	0	0	0	0	0	0	0	0	0	0	0	0	0	0	0	0	1	0	0	2	1
cf .Retibreviticolpites sp.	0	0	0	0	0	2	0	1	1	0	0	1	0	2	1	1	0	0	0	0	0	0	0	0	0	0	1	0	0	0	0	0	0	0	0	3	0	4	5	2	0	0	0	0	0	0	0	1	3
cf. Faguspollenites sp.	0	0	0	0	0	0	0	0	0	0	0	0	0	1	0	0	0	0	0	0	0	0	0	0	0	0	0	0	0	0	0	0	0	0	0	0	0	0	0	0	0	0	0	0	0	0	0	0	0
cf. Horniella sp. (4 pores)	0	0	0	0	0	0	0	0	0	0	0	0	0	0	0	0	0	0	0	0	0	0	0	0	0	0	0	0	0	0	0	0	0	1	0	0	0	0	0	0	0	0	0	0	0	0	0	0	0
cf. Intratriporopollenites sp.	4	0	0	0	1	3	0	0	0	1	0	0	0	0	0	1	0	3	0	0	0	0	6	0	0	1	0	0	0	0	0	0	0	0	7	0	0	0	8	0	0	4	0	0	0	0	2	0	0
cf. Margocolpopollenites spp.	0	0	0	0	0	0	0	0	0	0	0	0	0	0	0	0	0	0	0	0	0	0	0	0	0	0	0	0	0	0	0	0	0	0	0	0	0	0	0	0	0	0	0	0	0	1	0	0	0
cf. Retitrescolpites sp	0	0	0	0	0	0	0	0	0	0	0	0	0	0	0	0	0	0	0	0	0	0	0	0	1	0	0	0	0	0	0	0	0	0	0	0	0	0	0	0	0	0	0	0	0	0	0	0	0
cf. Rhoipites latus	0	0	0	0	0	0	0	0	0	0	0	0	0	0	0	0	0	0	0	0	0	0	0	0	0	0	0	0	0	0	0	0	0	0	0	0	0	0	0	0	0	0	0	0	0	0	0	0	1
cf. Rhoipites sp.	0	0	0	0	0	0	0	0	0	0	0	0	0	0	0	0	0	0	0	0	0	0	0	0	0	0	0	0	0	0	0	0	0	0	0	0	0	0	0	0	0	0	0	0	0	0	0	0	1
cf. Symplocos sp. 1	0	0	0	0	0	0	0	0	0	0	0	0	0	0	0	0	0	0	0	0	0	0	0	0	0	0	0	0	0	0	0	0	0	0	0	1	0	0	0	0	0	0	0	0	0	0	0	0	0
Corsinipollenites psilatus	0	0	0	0	0	0	0	0	0	0	0	0	0	0	0	0	0	0	0	0	0	0	0	0	0	0	0	0	0	0	0	0	0	0	0	0	0	0	0	0	0	0	0	0	0	0	0	0	0
Corsinipollenites spp. Undiff	0	0	0	0	0	0	0	0	0	0	0	0	0	0	0	0	0	0	0	0	0	0	0	0	0	0	0	0	0	0	0	0	1	0	0	0	0	0	0	0	0	0	0	0	0	0	0	0	0
Corsinipollenites verrucatus	0	1	1	1	0	0	0	0	0	0	0	1	0	0	0	0	0	0	0	0	1	0	0	0	0	0	0	0	0	0	0	0	0	0	0	0	0	0	0	0	0	0	0	0	0	0	1	0	2
Cupuliferoidaepollenites liblarensis	0	0	0	0	0	0	0	0	0	0	0	0	0	0	0	0	0	0	0	0	0	0	0	0	0	0	0	0	0	0	0	0	0	1	0	1	0	0	0	0	0	0	0	0	0	0	0	0	0
Cyrillaceaepollenites barghoornianicus	0	0	0	0	0	0	0	0	0	0	0	0	0	0	0	0	0	0	0	0	0	0	0	0	0	0	0	0	0	0	0	0	0	0	0	0	0	0	0	0	0	0	0	0	0	0	0	0	0
Cyrillaceaepollenites megaexactus	0	0	0	0	0	0	0	0	0	0	0	0	0	0	0	0	0	0	0	0	0	0	0	0	0	0	0	0	0	0	0	0	0	0	0	0	0	0	0	0	0	0	0	0	0	0	0	0	0
Emmapollis	0	0	0	0	0	0	0	0	0	0	0	0	0	0	0	0	0	0	0	0	0	0	0	0	0	0	0	0	0	0	0	0	0	0	0	0	0	0	0	0	0	0	0	0	0	0	0	0	0
Erdmanipollis cretaceus	0	0	0	0	0	0	0	0	1	0	0	0	0	1	0	1	0	0	0	0	0	0	0	1	0	0	0	0	0	0	0	0	0	0	0	0	0	0	0	0	0	0	0	0	0	0	0	0	0
Ericipites spp.	2	2	8	4	4	7	2	5	6	7	7	7	10	5	3	4	9	5	10	7	5	9	1	3	1	6	11	1	1	0	0	2	5	5	1	9	6	4	7	9	10	8	3	12	6	7	6	7	9
Eucommia? leopoldae	0	1	0	0	0	0	0	0	1	0	0	0	0	0	0	1	0	0	0	0	0	0	0	0	0	0	0	0	0	0	0	1	0	0	0	0	2	0	0	0	0	0	0	0	0	0	0	0	0
Faguspollenites sp.	0	0	0	1	0	0	1	1	0	2	3	0	0	2	3	2	0	4	0	0	1	0	0	2	0	2	0	0	0	4	0	0	2	2	6	0	2	2	4	0	0	1	2	3	5	2	1	2	3
Favitricolpites baculoferus	6	8	8	6	8	3	8	5	7	3	6	5	6	4	5	6	6	2	5	3	10	11	5	10	10	10	7	5	8	0	5	3	11	10	4	7	15	20	3	14	13	7	9	12	10	10	6	9	8
Fraxinoipollenites spp. Undiff	0	0	0	0	1	1	0	0	0	0	1	1	0	1	0	0	0	0	1	1	3	1	0	0	0	0	0	1	0	1	0	2	0	0	2	2	0	0	0	0	0	1	2	0	0	0	2	0	0
Fraxinoipollenites varabilis	2	0	0	0	0	0	0	1	1	1	0	1	0	1	0	0	0	0	1	0	1	0	0	0	0	1	2	1	0	1	0	0	1	1	0	0	0	0	0	0	0	0	1	0	0	0	0	1	0
Holkopollenites chermendensis	2	32	19	11	3	7	12	7	12	7	14	10	4	7	11	13	10	5	7	13	3	14	3	7	9	15	3	21	9	6	3	15	5	9	13	14	8	12	8	23	11	4	8	10	14	11	7	6	2
Horniella fissurata	0	0	0	0	0	0	0	0	0	0	0	0	0	0	0	0	0	0	0	0	0	0	0	0	0	0	1	0	0	0	0	0	0	0	0	0	0	0	0	0	0	0	0	0	0	0	0	0	0
Horniella sp. A	0	0	0	0	0	0	0	0	0	0	0	0	0	0	0	1	0	0	0	0	0	0	0	0	0	0	0	0	0	0	0	0	0	0	0	0	0	0	0	0	0	0	0	0	0	0	0	0	0
Horniella spp. Undiff	0	0	0	0	1	0	0	0	1	0	0	0	0	0	0	1	0	0	0	1	0	0	0	0	1	0	0	0	0	0	0	0	0	0	1	0	1	0	0	1	0	0	0	0	0	0	0	0	0
Ilexpollenites parvus	1	0	0	0	0	0	0	0	0	0	0	0	0	0	0	0	0	0	0	0	0	0	0	0	0	2	1	0	0	2	0	0	1	0	0	0	0	0	0	0	0	3	0	0	0	0	0	1	0
Ilexpollenites spp. Undiff	1	1	1	0	0	1	1	0	2	1	0	0	0	1	0	0	0	1	0	1	0	0	1	0	2	1	2	2	0	0	0	2	0	0	1	1	1	0	3	2	0	1	0	0	0	0	0	1	0
Insulapollenites rugulatus	0	0	0	0	0	0	0	0	0	1	0	1	0	0	0	0	1	0	0	2	0	0	0	0	0	0	0	0	0	0	0	0	0	0	0	0	0	0	0	0	0	0	1	0	0	0	0	0	0
Interpollis microsupplingensis	0	0	0	0	0	0	0	0	0	0	0	0	0	0	0	0	0	0	0	0	0	0	0	0	0	0	0	0	0	0	0	0	0	0	0	0	0	0	0	0	0	0	0	0	0	0	0	0	0
Intratriporopollenites pseudoinstructus	0	0	0	1	0	0	0	0	0	0	0	0	0	0	0	0	0	0	0	0	0	0	0	0	0	0	0	0	0	0	0	0	0	0	0	0	0	0	0	0	0	0	0	0	0	0	0	0	0
Intratriporopollenites tetraforaminipites	0	0	1	0	1	0	1	0	1	0	0	0	0	1	0	0	2	1	0	0	0	0	2	0	0	0	0	0	0	0	0	1	0	0	1	0	0	0	0	0	0	0	0	0	0	0	0	0	0
Intratriporopollenites vescipites	0	0	0	0	0	0	0	0	0	0	0	0	0	0	0	0	0	0	0	0	0	0	0	0	0	0	1	0	0	0	0	1	0	0	0	0	0	0	0	0	0	0	0	0	0	0	0	0	0
Intriporopollenites spp. Undiff	0	0	0	0	0	0	0	0	0	0	0	0	0	0	0	0	0	0	0	0	0	0	0	0	0	0	0	0	0	0	0	0	1	0	0	0	0	0	0	1	0	0	0	0	0	0	2	0	0
Jarzenipollenites trinus	0	0	0	0	0	0	0	0	0	1	0	0	0	0	0	0	0	0	0	0	0	0	1	0	0	0	0	0	0	0	0	0	0	0	0	0	0	0	0	0	0	0	0	0	0	0	0	0	0
Kyandopollenites anneratus	2	1	1	0	0	0	0	0	0	0	0	0	0	0	1	0	0	2	1	1	0	1	0	0	0	1	1	2	0	0	0	0	0	0	0	0	0	0	0	0	0	0	0	0	0	1	0	0	0
Labropollis sp.	0	0	0	0	0	0	0	0	0	0	0	0	1	1	0	0	0	0	0	0	0	0	0	0	0	0	0	0	0	0	0	0	0	0	0	0	0	0	0	0	0	1	0	1	0	0	1	0	1
Lanagiopollis cribellata	1	6	8	5	5	1	7	3	4	4	4	6	1	7	4	0	4	5	3	2	0	6	0	2	2	0	1	0	4	0	8	1	3	1	7	1	2	0	0	3	1	0	0	5	3	7	0	4	3
Lanagiopollis likohis	2	6	2	5	5	2	4	3	1	6	4	3	3	1	5	0	1	2	2	0	1	0	0	3	3	5	4	3	6	0	6	2	3	4	2	4	7	5	0	5	5	1	4	4	5	1	1	7	5
Legumiosae? type pollen	0	0	0	0	0	0	0	0	0	0	0	0	0	0	0	0	0	0	0	0	0	0	0	0	0	0	1	0	0	0	0	0	0	0	0	0	0	0	0	0	0	0	0	0	0	0	0	0	0
Malvasipollis	0	0	0	0	0	0	0	0	0	0	0	0	0	0	1	0	0	0	0	0	1	0	0	0	0	0	0	0	0	0	0	0	0	0	0	1	0	0	1	0	0	0	0	0	0	0	0	1	0
Margocolpopollenites sp. 1	0	0	1	0	0	0	0	0	0	0	0	0	0	0	0	0	0	0	0	0	0	0	0	0	0	0	0	0	0	0	0	0	0	0	0	0	0	0	0	0	0	0	0	0	0	0	0	0	0
Momi pites ventifluminis	1	0	0	0	1	2	1	0	0	0	0	0	0	1	1	0	0	0	0	0	0	0	0	0	1	0	3	0	0	2	0	0	1	0	0	0	0	0	0	0	0	1	1	1	2	0	1	0	0
Momipites all spp. (summed)	6	5	3	1	1	7	7	6	4	2	2	9	1	7	5	5	4	8	6	4	6	4	6	4	7	8	8	0	2	20	7	4	4	5	11	2	1	6	3	2	5	12	9	10	8	9	7	2	8
Momipites anellus	0	1	1	1	0	0	0	0	2	0	1	0	0	0	0	0	0	0	0	1	0	0	1	0	0	1	0	0	0	0	0	2	0	1	1	2	0	0	0	0	0	1	2	1	0	2	0	1	2
Momipites coryloides	0	0	0	0	0	0	0	0	0	0	0	0	0	0	0	1	0	0	0	0	0	0	0	0	0	2	0	0	0	0	0	0	0	0	0	0	0	0	0	0	0	0	0	0	0	0	1	0	0
Momipites nicholsii	0	0	0	0	0	0	0	0	0	0	0	0	0	1	0	0	0	1	0	0	0	0	0	1	0	0	0	0	0	0	0	0	0	0	0	0	0	0	0	0	0	0	0	0	0	0	0	0	0
Momipites spp. Undiff	4	4	2	0	0	5	6	6	2	2	1	9	1	5	3	4	4	7	6	3	6	3	5	3	6	5	5	0	2	18	6	2	2	4	9	0	1	6	3	2	5	10	6	8	6	7	4	1	6
Momipites strictus	1	0	0	0	0	0	0	0	0	0	0	0	0	0	1	0	0	0	0	0	0	1	0	0	0	0	0	0	0	0	1	0	1	0	1	0	0	0	0	0	0	0	0	0	0	0	1	0	0
Myocolpopollenites reticulatus	0	0	0	0	0	0	1	0	0	0	0	0	0	0	0	0	0	1	0	0	0	0	0	0	0	0	0	0	0	0	0	0	0	0	0	0	0	2	0	0	0	0	0	0	0	0	0	0	0
Nudopollis terminalis	1	1	4	3	0	1	1	1	3	8	2	1	5	4	3	6	2	4	6	2	4	5	2	1	5	2	5	0	3	7	4	10	1	4	1	1	1	2	2	3	7	1	0	0	1	0	3	0	1
Nuxpollenites psilatus	0	0	0	0	0	0	0	0	0	0	0	0	0	0	0	0	0	0	0	0	0	0	0	0	0	0	0	0	0	0	0	0	0	0	0	0	0	0	0	0	2	0	0	0	1	0	0	0	1
Nuxpollenites spp. Undiff	0	0	0	0	0	0	0	0	0	0	0	0	0	0	0	0	0	0	0	0	0	0	0	0	0	0	0	0	0	0	0	0	0	0	0	0	0	0	0	0	0	0	0	0	0	0	0	0	0
Nyssapollenites kruschii	15	13	8	18	4	8	7	9	6	4	6	7	15	11	12	9	7	3	16	6	17	3	17	8	15	14	24	41	9	28	5	12	5	6	17	8	9	5	12	8	9	21	5	0	5	12	13	7	6
Nyssapollenites paleocenicus	0	0	1	0	0	0	0	0	0	0	0	0	0	1	0	0	0	0	1	0	0	0	2	1	0	0	1	0	0	0	0	0	0	1	0	1	0	0	0	0	0	0	0	0	1	1	0	0	0
Nyssapollenites sp. (thick.exine)	0	0	0	0	0	0	0	0	0	0	0	0	0	0	0	0	0	0	0	0	0	0	0	1	0	0	0	0	0	0	0	0	1	0	0	0	0	0	0	0	0	0	0	0	0	0	0	0	0
Nyssapollenites spp. Undiff	1	0	0	2	0	4	0	1	0	1	0	0	0	0	0	3	0	0	3	0	1	1	2	0	3	0	11	3	0	2	1	1	1	1	3	2	0	0	1	1	1	2	2	0	1	1	1	1	0
Oacolpopollenites variabilis	2	2	1	1	0	0	1	0	1	0	1	0	0	0	0	0	0	0	0	0	0	3	1	1	1	1	1	1	0	0	1	1	0	0	0	0	0	0	0	0	0	0	0	0	0	0	5	1	1
Pandaniidites typicus	0	0	0	0	0	0	0	0	0	0	0	0	0	0	0	0	0	0	0	0	0	0	0	0	0	0	0	0	0	0	0	0	0	0	0	0	0	0	0	0	0	0	0	0	0	0	0	0	0
Periporopollenites sp .(Chenopod-type)	0	0	0	0	0	0	0	0	0	2	0	0	0	0	0	0	0	0	0	0	0	0	0	0	0	0	0	0	0	0	0	0	0	0	0	0	0	0	1	0	0	2	0	0	2	0	0	1	0
Periporopollenites sp. (Liquidamber-type)	0	0	0	0	0	0	0	0	0	0	0	0	0	0	0	0	0	0	0	0	0	0	0	0	0	0	0	0	0	0	0	0	0	0	0	0	0	0	0	0	0	0	0	0	0	0	0	0	0
Pistillate tricolporate?	0	0	0	0	0	0	1	0	0	0	0	0	0	0	0	0	0	0	0	0	0	0	0	0	0	0	0	0	0	0	0	0	0	0	0	0	0	0	0	0	0	0	0	0	0	0	0	0	0
Pistillipollenites macgregorii	3	0	0	3	1	1	0	4	0	1	6	2	3	3	4	3	3	1	1	5	2	0	1	1	3	5	4	0	3	3	3	0	5	7	1	2	2	1	2	2	3	3	1	6	4	5	2	0	0
Platycarya platycaryoides	0	0	0	0	0	0	0	0	0	0	0	0	0	0	0	0	0	0	0	0	0	0	0	0	0	0	0	0	0	0	0	0	0	0	0	0	0	0	0	0	0	0	0	0	0	0	0	0	0
Platycaryapollenites swasticoidus	0	0	0	0	0	0	0	0	0	0	0	0	0	0	0	0	0	0	0	0	0	0	0	0	0	0	0	0	0	0	0	0	0	0	0	0	0	0	0	0	0	0	0	0	0	0	0	0	0
Platycaryapollenites sp. A	0	0	0	0	0	0	0	0	0	0	0	0	0	0	0	0	0	0	0	0	0	0	0	0	0	0	0	0	0	0	0	1	0	0	0	0	0	0	0	0	0	0	1	0	0	0	0	0	0
Platycaryapollenites sp. B	0	0	0	1	0	0	0	1	1	0	0	0	0	0	0	0	0	0	0	0	0	0	0	0	0	0	0	0	0	0	0	0	0	0	0	0	0	0	0	0	1	0	0	0	0	0	0	1	0
Plicatopollis spp. Undiff	1	2	1	1	1	0	1	0	1	0	1	0	0	1	4	0	1	0	1	1	0	0	1	2	0	2	1	2	0	13	3	0	1	0	0	0	0	2	1	1	1	0	0	0	1	0	1	1	0
Polyatriopollenites vermontensis	1	0	0	0	1	1	0	0	1	0	1	1	1	1	0	0	0	0	0	0	0	0	0	0	0	0	0	0	1	0	0	0	1	1	0	0	1	2	2	0	1	2	1	6	2	1	0	3	1
Porcolpopollenites spp. Undiff	0	0	0	0	1	0	1	0	0	0	0	0	0	0	0	0	1	1	1	0	0	0	0	0	1	0	0	0	0	0	0	0	0	0	0	0	0	0	0	0	0	1	0	1	0	0	0	0	0
Porocolpopollenites olliveriae	0	0	0	0	1	0	0	0	1	0	0	0	0	0	0	0	0	0	0	0	0	0	0	0	0	0	0	0	0	0	1	0	0	0	0	0	1	0	0	0	0	0	0	0	0	0	0	0	0
Porocolpopollenites sp. (Elsik-type)	0	0	0	0	0	1	0	0	1	0	0	0	1	0	0	0	0	0	0	0	0	0	0	2	1	1	3	0	0	0	0	0	0	1	0	0	0	1	0	1	0	0	0	0	0	0	0	0	1
Pseudolaesipollis ventosus	0	0	0	0	0	0	0	0	0	0	0	0	0	0	0	0	0	0	0	0	0	0	0	0	0	0	0	0	0	0	0	0	0	0	0	0	0	0	0	0	0	0	0	0	0	0	0	0	0
Pseudplicapollis limitata	0	1	0	0	0	0	1	0	0	0	0	1	0	0	0	0	0	0	1	1	0	0	1	0	0	0	0	0	0	0	0	1	0	0	0	0	0	1	0	0	0	0	0	0	0	0	0	0	0
Quadrapollenites vagus	3	2	1	5	0	0	2	0	1	2	1	2	2	0	4	2	2	1	1	1	2	0	2	3	3	2	0	2	4	6	2	6	2	0	2	1	0	2	1	2	3	1	1	2	0	1	5	2	0
Reevesipollis sp.	0	0	0	0	0	0	0	0	0	0	0	0	0	0	0	0	0	0	0	0	0	0	0	0	0	0	0	0	0	0	0	0	0	0	0	0	0	0	0	0	0	0	0	0	0	0	0	0	0
Retibrevitricolpites simplex	0	0	0	0	0	0	0	0	0	0	0	0	0	0	0	0	0	0	0	0	0	0	0	0	0	0	0	0	0	0	0	0	0	0	0	0	0	0	0	0	0	0	0	0	0	0	0	0	0
Retibrevitricolpites spp. Undiff.	0	0	0	0	1	0	0	0	0	0	0	0	0	0	0	0	0	0	0	0	0	0	1	0	0	2	0	0	0	0	0	0	0	0	0	0	0	0	0	0	0	0	0	0	0	0	0	0	0
Reticuloidopollis?	0	0	0	0	0	0	0	0	0	1	0	0	0	0	0	0	0	0	0	0	0	0	0	0	0	0	0	0	0	0	0	0	0	1	0	0	0	1	1	1	0	1	0	0	0	0	0	0	0
Retirescolpites spp. Undiff	0	0	0	0	0	0	0	0	0	0	0	0	0	0	0	0	0	0	0	0	0	0	0	0	0	0	0	0	0	0	0	0	0	0	0	0	0	0	0	0	0	0	0	0	0	0	0	0	0
Retistephanocolporites sp.	0	0	0	0	0	0	0	0	0	0	0	0	0	0	0	0	0	0	0	0	0	0	0	0	0	0	0	0	0	0	0	0	0	0	0	0	0	0	0	0	0	0	0	0	0	0	0	0	0
Retitrescolpites anguloluminosus	0	1	1	0	1	2	1	0	1	1	1	0	1	1	0	1	0	1	0	1	0	0	1	2	1	1	0	0	2	0	0	1	0	0	1	0	0	0	0	2	0	1	0	0	0	3	4	0	0
Rhoipites cryptoporus	6	4	2	3	2	8	5	3	0	1	1	2	4	1	0	6	1	4	2	3	5	1	5	1	2	3	2	9	1	2	0	3	0	0	10	2	1	2	5	1	5	3	2	2	1	1	4	2	1
Rhoipites sp. (small <10 mm)	0	0	0	0	0	0	0	0	0	0	0	0	0	0	0	0	0	0	0	0	0	0	0	0	0	0	0	0	1	0	0	1	0	0	0	0	0	2	0	2	0	0	2	0	0	1	0	1	1
Rhoipites sp. A. (fine.exine)	0	0	0	0	0	1	1	0	0	0	0	0	0	0	1	0	0	0	0	0	0	0	0	0	0	0	0	0	0	0	0	0	0	0	0	0	0	0	0	0	0	0	0	0	0	0	0	0	0
Rhoipites spp.	1	1	1	3	0	5	2	1	0	1	2	1	0	1	0	3	0	2	1	1	0	1	1	1	3	3	1	0	1	4	1	0	3	2	5	3	0	1	4	1	3	1	3	2	2	3	1	3	2
Rousea spp. Undiff	1	0	1	0	0	0	2	0	1	0	0	0	0	0	0	1	0	1	0	0	0	0	1	0	0	0	0	0	0	0	0	0	0	0	0	0	1	0	1	0	1	0	0	0	0	0	0	0	0
Siltaria hanleyi	4	0	0	1	0	2	1	0	2	1	3	1	1	2	2	1	0	0	0	2	1	2	1	0	1	0	8	1	1	5	2	0	0	1	1	1	1	0	2	1	0	2	2	0	0	1	1	0	0
Siltaria pacata	4	0	0	3	1	2	1	2	0	0	1	4	2	1	0	0	2	1	5	1	1	2	1	1	1	0	15	0	1	11	1	0	2	0	2	0	1	2	3	1	2	2	5	1	0	0	2	4	6
Siltaria sp. (Sapotaceae-type)	6	6	2	2	4	3	2	1	5	0	2	0	3	0	5	2	2	0	3	3	1	1	1	4	8	2	4	0	7	11	3	3	2	1	4	4	1	2	4	3	4	5	4	3	6	3	2	4	2
Siltaria sp. (small <10 mm)	0	1	1	0	0	0	0	0	0	0	0	0	0	0	1	0	0	0	2	0	0	0	0	0	0	0	0	0	0	2	1	0	0	0	1	0	0	0	1	0	0	0	1	1	0	1	0	1	0
Siltaria sp. cf. S. scabiextima	1	0	0	0	1	0	0	0	0	0	0	0	0	0	0	0	0	0	0	0	0	0	1	0	0	0	1	0	0	0	0	0	0	0	1	0	0	0	0	0	0	0	0	0	0	0	0	0	0
Siltaria spp. Undiff	1	0	0	0	1	0	0	0	0	0	0	0	0	0	2	1	2	2	2	1	0	0	2	0	4	0	2	0	1	3	0	1	1	1	1	0	0	1	2	0	1	1	0	3	0	0	0	1	0
Spinaepollis spinosus	6	11	3	5	5	3	1	1	4	2	6	1	2	6	4	5	3	4	3	2	2	2	4	4	2	8	17	1	14	28	9	10	6	8	8	3	2	9	11	6	2	3	6	3	6	9	12	5	8
Stephanocolporate sp.	0	0	0	0	0	1	0	0	1	0	0	0	0	0	0	0	0	0	0	0	0	1	0	0	1	0	0	0	0	0	0	0	0	0	0	0	0	0	0	0	0	0	0	0	0	0	0	0	0
Stephanocolporate sp. (small <15 mm)	0	0	0	0	0	0	0	0	0	0	0	0	0	0	0	0	0	0	0	0	0	0	0	0	0	0	0	0	0	0	0	0	0	1	0	0	0	0	0	0	0	0	0	0	1	1	0	0	0
Stephanoporate sp. (Punctate)	0	0	0	0	0	0	0	0	0	0	0	0	0	0	0	0	0	0	0	0	0	0	0	0	0	0	0	0	0	0	0	0	0	0	0	0	0	0	0	0	0	0	0	0	0	0	0	0	0
Striatopollis spp. Undiff.	0	0	0	0	0	0	0	0	0	0	0	0	0	0	0	0	0	0	0	0	0	0	0	0	0	0	0	0	0	0	0	0	0	0	0	0	0	0	0	0	0	0	0	0	0	0	0	0	0
Subtriporopollenites annulatus	0	0	0	0	0	0	0	0	0	0	0	0	0	0	0	0	0	0	0	0	0	0	0	0	0	0	0	0	0	0	0	0	0	0	0	0	0	0	0	0	0	0	0	0	0	0	0	0	0
Symplocopollenites thalmannii	0	0	0	0	0	0	0	0	0	0	0	0	0	0	0	0	0	0	0	0	0	1	0	0	0	0	0	0	0	0	0	0	1	0	0	0	0	0	0	0	0	0	0	0	0	0	0	0	0
Symplocos contracta	0	0	0	0	0	0	0	0	0	0	0	0	0	0	0	0	0	0	0	0	0	0	0	0	0	0	0	0	0	0	0	0	0	0	0	0	0	0	0	0	0	0	0	0	1	0	0	0	0
Symplocos spp. Undiff.	0	0	0	0	0	0	0	0	0	0	0	0	0	0	0	0	0	0	0	0	0	0	0	0	0	0	0	0	0	0	0	0	0	0	1	0	0	0	0	1	0	0	0	0	0	0	0	0	0
Symplocos vestibulum	0	0	0	0	2	0	0	1	0	0	1	0	0	0	0	0	0	0	0	3	0	0	1	0	0	0	0	0	0	0	0	0	0	1	2	1	0	0	0	0	0	0	0	0	1	0	0	1	0
Syncolporites sp. 2	0	0	0	0	0	0	0	0	0	0	0	0	0	0	0	0	0	0	0	0	0	0	0	0	0	0	2	0	0	1	0	0	0	0	0	0	0	0	0	0	0	0	0	0	0	0	1	0	0
Tetracolpopollenites megadolium	2	0	0	1	0	0	2	1	0	0	0	0	0	0	1	0	0	0	0	0	0	0	2	0	1	0	0	0	0	1	0	0	0	0	0	0	2	1	0	0	0	0	0	0	0	0	0	1	0
Tetracolporopollenites sp. (striate)	0	0	0	0	0	0	0	0	0	0	0	0	0	0	0	0	0	0	0	0	0	0	0	0	0	0	0	0	0	0	0	0	0	0	0	0	0	0	0	0	0	0	0	0	0	0	0	0	0
Thomsonipollenites magnificus	25	27	14	28	11	18	15	18	16	7	16	7	10	9	9	14	7	6	13	11	6	11	19	22	20	13	19	39	34	24	16	29	6	8	17	12	13	8	16	17	8	10	9	11	17	20	9	12	20
Thomsonipollis exploitus	0	0	0	0	0	0	0	0	0	0	0	0	0	0	0	0	0	0	0	0	0	0	0	0	0	0	0	0	0	0	0	0	0	0	0	0	0	0	0	0	0	0	0	0	0	0	0	0	0
Tricolpite cf T.hians	0	2	0	0	0	3	2	0	2	1	0	1	1	3	5	0	0	0	2	2	2	0	1	1	2	1	1	0	0	2	1	0	2	0	7	2	0	4	0	0	1	1	10	1	0	7	0	1	2
Tricolpites asper	18	3	10	7	2	1	4	9	1	5	6	9	13	7	3	3	1	3	5	1	7	4	0	11	6	3	12	0	0	15	4	2	7	7	4	7	6	4	11	4	9	2	5	1	4	11	2	8	17
Tricolpites cf. T. asper	1	1	1	0	4	2	3	2	4	3	0	2	3	8	5	3	7	4	3	1	0	4	3	0	2	1	2	0	0	0	0	1	2	2	4	6	0	3	4	0	3	2	4	1	2	3	0	3	0
Tricolpites crassus	0	0	0	0	0	0	0	0	0	0	0	0	0	0	0	1	0	0	0	0	0	0	0	0	0	1	0	0	0	0	0	0	0	0	0	0	0	0	0	0	0	0	0	0	0	0	0	0	0
Tricolpites hians	1	0	0	2	0	2	2	0	0	1	0	2	1	1	1	0	0	0	2	0	4	0	2	1	5	1	2	9	2	10	7	0	0	0	0	1	1	0	1	0	0	1	0	0	0	1	6	0	0
Tricolpites sp. (punctate)	0	0	0	0	0	0	0	0	0	0	0	0	0	0	0	0	0	0	0	0	0	0	0	0	0	0	0	0	0	0	0	0	0	0	0	0	0	0	0	0	0	0	0	0	0	0	0	0	0
Tricolpopollenites sp. (striate, ?Ailanthipites)	0	0	0	0	0	0	0	0	0	0	0	0	0	0	0	0	0	0	0	0	0	0	0	0	0	0	0	0	0	0	0	0	0	0	0	0	0	0	0	0	0	0	0	0	0	0	0	0	0
Tricolpopollenites sp. A (Tschudy)	0	0	1	1	0	0	0	0	0	0	0	0	0	0	0	0	0	1	0	0	0	0	0	0	0	0	0	0	0	0	0	0	0	1	0	1	0	0	0	0	0	1	0	0	0	0	0	0	0
Tricolpopollenites sp. B	0	0	0	0	0	0	0	0	0	0	1	0	0	0	0	0	0	0	0	0	0	0	1	0	0	0	0	0	1	0	0	0	0	0	0	0	0	0	0	0	0	0	0	0	0	0	0	0	0
Tricolpopollenites sp. C	0	0	0	0	0	0	0	0	0	0	0	0	0	0	0	0	0	0	0	0	0	0	0	0	0	0	0	0	0	0	0	0	0	0	0	0	0	0	0	0	0	0	0	0	0	0	0	0	0
Tricolpopollenites sp. D	0	0	0	0	0	0	0	0	0	0	0	0	0	0	0	0	0	0	0	0	0	0	0	0	0	0	0	0	0	0	0	0	0	0	0	0	0	0	0	0	0	0	0	0	0	0	0	0	0
Tricolpoporopollenites sp. A	0	0	0	0	0	0	0	0	0	0	0	0	0	0	0	0	0	0	0	0	0	0	1	0	0	0	1	0	0	0	0	0	0	0	0	0	0	0	0	0	0	0	0	0	0	0	0	0	0
Tricolporate sp. (Echinate?)	0	0	0	0	0	0	0	0	0	0	0	0	0	0	0	0	0	0	0	0	1	0	0	0	0	1	0	0	0	0	0	0	0	0	0	0	0	0	0	0	0	0	0	0	0	0	0	0	0
Tricolporopollenites sp (verrucate)	0	0	0	0	0	0	0	0	0	0	0	0	0	0	0	0	0	0	0	0	0	0	0	0	0	0	0	0	0	0	0	0	0	0	0	0	0	0	0	0	0	0	0	0	0	0	0	0	0
Tricolporopollenites sp. (psilate margines)	0	0	0	1	0	0	0	0	0	0	0	0	0	0	0	0	0	0	0	0	0	0	0	0	0	0	0	0	0	0	0	0	0	0	0	0	0	0	0	0	0	0	0	0	0	0	0	0	0
Tricolporopollenites sp. (reticulate, big pores)	0	0	0	0	0	0	0	0	0	0	0	0	0	0	0	0	0	0	0	0	0	0	0	0	0	0	0	0	0	0	0	0	0	0	0	0	0	0	0	0	0	0	0	0	0	0	0	0	0
Tricolporopollenites sp. (rugulate)	0	0	0	0	0	0	0	0	0	0	0	0	0	0	0	0	0	0	0	0	0	0	0	0	0	0	0	0	0	0	0	0	0	0	0	0	0	0	0	0	0	0	0	0	0	0	0	0	0
Tricolporopollenites sp. A (Striate)	0	0	0	0	0	0	0	0	0	0	0	0	0	0	0	0	0	0	0	0	0	0	0	0	0	0	0	0	0	0	0	0	0	0	0	0	0	0	0	0	0	0	0	0	0	0	0	0	0
Tricolporopollenites spp. Undiff.	0	0	0	0	0	0	0	0	0	0	0	0	0	0	0	0	0	0	0	0	0	0	0	0	0	0	0	0	0	0	0	0	0	0	0	0	0	0	0	0	0	0	0	0	0	0	1	0	0
Triporopollenites curryi	0	0	0	0	0	0	0	0	0	0	0	0	0	0	0	0	0	0	0	0	0	0	0	0	0	0	0	0	0	0	0	0	0	0	0	0	0	0	0	0	0	0	0	0	0	0	0	0	0
Trudopollis .sp. B	0	1	0	0	0	0	0	0	0	0	0	0	0	0	0	0	0	0	0	0	0	0	0	0	0	0	0	0	1	0	0	0	0	0	0	0	1	0	0	0	0	0	0	0	0	1	0	0	0
Trudopollis spp. Undiff	0	0	0	0	0	0	0	0	0	0	0	0	0	0	0	0	0	0	0	0	0	0	0	0	0	0	0	0	0	0	1	0	0	0	0	0	0	0	0	1	0	0	0	0	0	0	1	0	0
Ulmipollenites spp. Undiff	1	0	2	3	1	0	1	3	3	3	1	2	2	5	4	3	3	4	2	4	1	0	4	3	1	1	0	0	0	2	2	0	1	6	2	2	0	4	1	2	4	4	3	8	10	3	2	2	8
Ulmipollenites undulosus	0	0	0	0	0	0	0	0	0	0	0	0	0	0	0	0	0	0	0	0	0	0	0	0	0	0	0	0	0	0	0	0	0	0	0	0	0	0	0	0	0	0	0	0	0	0	0	0	0
Zonocolporate (striate)	0	0	0	0	0	0	0	0	0	0	0	0	0	0	0	0	0	0	0	0	0	0	0	0	0	0	0	0	0	0	0	0	0	0	0	0	0	0	0	0	0	0	0	0	0	0	0	0	0
Reworked palynomorphs	0	0	0	0	0	0	0	0	0	0	0	0	0	0	0	0	0	0	0	0	0	0	0	0	0	0	0	0	0	0	0	0	0	0	0	0	0	0	0	0	0	0	0	0	0	0	0	0	0
(R) Wodehousei spp.	0	0	0	0	0	1	0	0	0	0	0	0	0	1	0	0	0	0	0	0	0	0	0	1	0	0	0	0	0	0	0	0	0	0	0	0	0	0	0	0	0	0	0	0	0	0	1	0	0
(R) cf. Choanopollis spp.	0	0	0	0	0	0	0	0	0	0	0	0	0	0	0	0	0	0	0	0	0	0	0	0	0	0	0	0	0	0	0	0	0	0	0	0	0	0	0	0	0	0	0	0	1	0	0	0	0
(R) Piolencipollis endocuspoides	0	0	0	0	0	0	0	0	0	0	0	0	0	1	0	0	0	0	0	0	0	0	0	0	0	0	0	0	0	0	0	0	0	0	0	0	0	0	0	0	0	0	0	0	0	0	0	0	0
[truncated: 36 more columns]

## Sheet: δ13C-TOC
Bulk organic stable carbon isotope ratios
sample	depth (mbs)	epoch	δ13C-TOC
H33	112.814	eoc	-26.486
H32	113.005	eoc	-26.5895
H31	113.195	eoc	-27.028
H30	113.386	eoc	-26.7864
H29	115.392	eoc	-25.687
H28	115.659	eoc	-25.8385
H27	116.116	eoc	-25.803
HC100	117.043	eoc	-26.3358
H26	117.17	eoc	-25.7445
HC095	117.551	eoc	-26.1652
H25	117.653	eoc	-26.541
H24	117.805	eoc	-26.7625
HC090	118.059	eoc	-26.4646
H23	118.161	eoc	-26.199
HC085	118.567	eoc	-25.756
H22	118.593	eoc	-26.3413
HC084	118.669	eoc	-26.2534
HC083	118.77	eoc	-27.0118
HC082	118.872	eoc	-27.8802
H21	118.897	eoc	-28.0002
HC080	119.075	eoc	-28.1576
HC078	119.278	eoc	-27.629
HC076	119.482	eoc	-27.7994
H20	119.558	eoc	-27.9751
HC072	119.685	eoc	-27.7248
H19	119.837	eoc	-28.029
HC068	119.888	eoc	-27.357
HC064	120.091	eoc	-27.7573
H18	120.269	eoc	-26.5129
HC060	120.294	eoc	-27.6678
HC059	120.345	eoc	-27.5075
HC058	120.396	eoc	-26.5142
HC057	120.447	eoc	-25.102
HC056	120.498	eoc	-24.7322
HC055	120.548	eoc	-25.6837
HC054	120.599	eoc	-25.3588
HC053	120.65	eoc	-28.3374
HC052	120.701	eoc	-26.6586
HC048	120.904	eoc	-26.319
HC046	121.006	eoc	-26.3102
HC044	121.107	eoc	-27.1514
HC041	121.26	eoc	-26.8597
HC040	121.31	eoc	-27.4058
HC038	121.412	eoc	-26.8712
HC036	121.514	eoc	-26.7636
H15	121.539	eoc	-26.9736
HC035	121.564	eoc	-27.6189
HC034	121.615	eoc	-28.5837
HC033	121.666	eoc	-27.4456
HC032	121.717	eoc	-26.4542
HC031	121.768	eoc	-26.9008
HC030	121.818	eoc	-26.8306
HC029	121.869	eoc	-26.0706
HC028	121.92	pal	-25.778
HC026	122.022	pal	-25.5614
HC024	122.123	pal	-25.5722
HC023	122.174	pal	-25.098
HC022	122.225	pal	-25.4831
HC018	122.428	pal	-25.5545
HC013	122.834	pal	-25.7202
H12	123.266	pal	-25.7665
HC007	123.444	pal	-25.3963
H11	123.596	pal	-25.704
H10	123.927	pal	-25.6821
HC001	124.054	pal	-25.2798
H9	124.257	pal	-25.691
H8	124.587	pal	-25.5765
H7	125.197	pal	-25.71
H6	125.705	pal	-25.3725
H5	126.34	pal	-25.562
H4	126.924	pal	-25.4855
H3	127.559	pal	-26.063
H2	128.143	pal	-25.6905
H1	128.575	pal	-26.146

## Sheet: compound specific δ13C
compound specific stable carbon isotope ratios
sample	epoch	depth	phytane	run 1	run 2	C29 sterane	run 1	run 2
HC074	Eoc	119.583		-33.188	-31.688		-29.8	-29.7
HC035	Eoc	121.56		-32.47	-33.402		-30.1	-30.7
HC033	Eoc	121.666		-33.038	-34.526		-32.6	-29.8
HC027	Pal	121.971		-30.319	-30.311		-27.9	-28.7
HC003	Pal	123.85					-26

## Sheet: TEX86
TEX86 analyses
Core sample	Depth	Strat.	Area
sample	mbs	epoch	m/z 1302	m/z 1300	m/z 1300' (H(0) cren)	m/z 1298	m/z 1296	m/z 1292	m/z 1292'	m/z 1050	m/z 1036	m/z 1022	BIT	Tex 86	KIM2010 - H	GDGT-1	KIM2010-L
HC 100	117.043	eoc	471000	86300	121000	106000	60200	883000	43700	9250	78500	530000	0.411628	0.708643	28.3692	-0.376956	21.4555
HC 082	118.872	eoc	658000	159000	163000	292000	164000	4320000	367000	556000	56500	799000	0.246271	0.838086	33.3529	-0.323492	25.0643
HC 080	119.075	eoc	225000	61900	61400	129000	70300	2040000	215000	2200	15600	239000	0.111808	0.870013	34.4635	-0.306383	26.2191
HC 076	119.482	eoc	476000	139000	136000	305000	173000	5860000	588000	3560	32300	445000	0.0758351	0.884647	34.9591	-0.305985	26.246
HC 068	119.888	eoc	759000	206000	242000	481000	306000	11800000	1240000	9430	37900	649000	0.0557228	0.907747	35.7248	-0.314804	25.6507
HC 060	120.294	eoc	308000	86600	102000	181000	115000	4460000	468000	3030	16400	270000	0.0609399	0.89819	35.4104	-0.325066	24.958
HC 058	120.396	eoc	62700	14800	25600	31300	20400	588000	74600	1120	4920	57000	0.0968297	0.89511	35.3083	-0.327277	24.8088
HC 056	120.498	eoc	35800	6950	18900	12900	7490	178000	45300	1180	2490	23900	0.134115	0.904323	35.6125	-0.326209	24.8809
HC 053	120.65	eoc	989000	244000	338000	595000	360000	13900000	1590000	10300	48800	866000	0.0624009	0.912513	35.8804	-0.304302	26.3596
HC 048	120.904	eoc	274000	82900	83300	171000	118000	4300000	413000	2070	18300	239000	0.0568872	0.894381	35.2842	-0.33743	24.1235
HC 044	121.107	eoc	318000	98700	94300	212000	143000	5440000	540000	1840	22000	297000	0.0556933	0.900674	35.4924	-0.330433	24.5958
HC 040	121.31	eoc	562000	180000	132000	370000	168000	8490000	826000	2990	33600	496000	0.0590285	0.88342	34.9178	-0.287923	27.4652
HC 036	121.514	eoc	663000	213000	186000	434000	283000	10100000	1050000	7280	39300	599000	0.0600787	0.892424	35.2191	-0.330993	24.558
HC 034	121.615	eoc	1080000	311000	272000	564000	358000	12300000	1170000	7570	46400	819000	0.0662698	0.870578	34.4829	-0.339684	23.9713
HC 032	121.717	eoc	621000	212000	172000	406000	262000	8630000	803000	4860	68800	553000	0.0676983	0.874034	34.6006	-0.335957	24.2229
HC 030	121.818	eoc	371000	110000	104000	234000	146000	5150000	500000	7290	164000	476000	0.111654	0.888889	35.1012	-0.32098	25.2338
HC 029	121.869	eoc	1210000	178000	305000	216000	211000	2110000	215000	49500	383000	2160000	0.551302	0.782927	31.3305	-0.447302	16.7071
HC 028	121.92	pal	1410000	182000	315000	194000	213000	519000	38900	72600	583000	3400000	0.886547	0.710145	28.4321	-0.482314	14.3438
HC 026	122.022	pal	1330000	110000	295000	186000	204000	828000	62400	94800	682000	2940000	0.817814	0.80441	32.1346	-0.429457	17.9116
HC 024	122.123	pal	945000	107000	224000	111000	124000	256000	17700	52500	364000	1830000	0.897702	0.70253	28.1119	-0.488703	13.9125
HC 022	122.225	pal	1250000	157000	315000	182000	195000	649000	49600	58400	511000	2760000	0.836869	0.73098	29.2911	-0.46747	15.3458
HC 020	122.326	pal	1670000	210000	402000	226000	247000	483000	38400	99400	701000	3960000	0.907884	0.708899	28.38	-0.480312	14.4789
HC 018	122.428	pal	926000	104000	217000	130000	144000	530000	38900	59500	469000	2050000	0.8295	0.75054	30.0756	-0.463548	15.6105
HC 016	122.53	pal	1800000	228000	460000	273000	254000	550000	37400	96000	768000	4070000	0.899708	0.712267	28.5207	-0.441784	17.0796
HC 013	122.834	pal	1250000	160000	342000	175000	186000	357000	25000	56800	433000	2720000	0.89991	0.70696	28.2986	-0.4738	14.9185
HC 010	123.139	pal	661000	92100	162000	101000	102000	204000	15800	45800	292000	1230000	0.884863	0.703763	28.164	-0.465648	15.4688
HC 007	123.444	pal	859000	99100	178000	111000	129000	445000	29800	60000	438000	1800000	0.837769	0.731364	29.3067	-0.485005	14.1622
HC 001	124.054	pal	2620000	329000	667000	358000	397000	910000	62700	116000	859000	4840000	0.864684	0.71309	28.5551	-0.481146	14.4226

## Sheet: MBT-CBT
MBT-CBT analyses
Core sample	Depth	Area
sample	mbs	m/z 1292	m/z 1050	m/z 1048	m/z 1046	m/z 1036	m/z 1034	m/z 1032	m/z 1022	m/z 1020	m/z 1018	BIT	MBT	CBT	pH	MAT (Weijers et al., 2007)	MBT'	MAT (Peterse et al., 2012)
HC 100	117.043	2920000	10900			105000	13600		1820000	256000	47500	0.435531	0.942521	0.853711	6.51655	32.5605	0.942521	25.1876
HC 082	118.872	4180000				24700			769000	104000	36000	0.182588	0.973546	0.882623	6.44047	33.8224	0.973546	25.9855
HC 080	119.075	1490000							163000	25600	4990	0.114986	1	0.803948	6.64751	35.8503	1	27.2516
HC 076	119.482	3360000				5820			250000	42600	12700	0.084748	0.981293	0.778525	6.71441	35.163	0.981293	26.8159
HC 068	119.888	7910000				9710			398000	70300	61900	0.0638954	0.982016	0.763396	6.75422	35.338	0.982016	26.924
HC 060	120.294	1980000							122000	8840	8450	0.0657248	1	1.13991	5.7634	32.7555	1	25.3467
HC 058	120.396	357000							10700
HC 056	120.498	369000							17700
HC 053	120.65	12200000				19300			763000	79900	80000	0.0716927	0.979516	0.990827	6.15572	33.1198	0.979516	25.557
HC 048	120.904	2740000							143000	25100	13900	0.0622861	1	0.755662	6.77457	36.2951	1	27.5254
HC 044	121.107	3550000							118000	24000	6970	0.0402734	1	0.691671	6.94297	36.8846	1	27.8882
HC 040	121.31	3860000							211000	30200	18400	0.0630158	1	0.844276	6.54138	35.4788	1	27.023
HC 036	121.514	8480000				18100			456000	90900	65600	0.0692161	0.971297	0.717306	6.87551	35.2345	0.971297	26.8531
HC 034	121.615	18400000				48900			1150000	235000	131000	0.0783826	0.968752	0.707715	6.90075	35.1975	0.968752	26.8286
HC 032	121.717	4060000				31300			267000	56900	38100	0.0883165	0.920417	0.719541	6.86963	32.7075	0.920417	25.2631
HC 030	121.818	1930000				60700			180000	31400	210000	0.199867	0.874093	0.884546	6.4354	28.9055	0.874093	22.8915
HC 029	121.869	1900000	44900			330000	77800	3400	1970000	245000	80700	0.591556	0.834254	0.852794	6.51896	27.2355	0.834254	21.8365
HC 028	121.92	488000	27700			545000	37500	5590	3170000	367000	107000	0.897215	0.855441	0.96304	6.22884	27.2637	0.855441	21.8682
HC 026	122.022	382000	66600			520000	51800	5000	2810000	311000	93000	0.909893	0.833204	0.962777	6.22953	26.1707	0.833204	21.1804
HC 024	122.123	213000	29900			287000	66300	2470	1480000	178000	49600	0.907643	0.815757	0.859313	6.50181	26.2643	0.815757	21.2262
HC 022	122.225	607000	54300			493000	123000	3590	2650000	326000	89300	0.860337	0.819776	0.845098	6.53922	26.5933	0.819776	21.4314
HC 020	122.326	417000	87400			675000	145000	8130	3560000	401000	119000	0.922957	0.81673	0.889661	6.42195	26.0327	0.81673	21.0843
HC 018	122.428	396000	41500			381000	73300	7850	1610000	256000	67500	0.860226	0.793345	0.78148	6.70663	25.8772	0.793345	20.9727
HC 016	122.53	561000	65100			480000	61000	5110	2120000	324000	81800	0.848297	0.805162	0.829513	6.58023	26.0169	0.805162	21.0667
HC 013	122.834	302000	25400			367000	41100	4020	2170000	256000	76700	0.906854	0.851195	0.931418	6.31206	27.3458	0.851195	21.9159
HC 010	123.139	154000	29200			215000	33200	2340	1050000	126000	38800	0.906584	0.812825	0.900147	6.39435	25.7437	0.812825	20.9037
HC 007	123.444	415000	54900			396000	119000	6640	1560000	265000	70900	0.856274	0.766813	0.707038	6.90253	25.256	0.766813	20.5723
HC 001	124.054	406000	36100			361000	36400	4160	2250000	293000	86900	0.883117	0.857326	0.899083	6.39715	27.9457	0.857326	22.2893

## Sheet: MS
Magnetic Susceptibility Results
sample	depth (mbs)	Epoch	Specific Magnetic Susceptibility (x10E-8 mE3 / Kg)
HC111	115.214	eoc	6.23822
HC110	115.316	eoc	5.8307
HC109	115.418	eoc	4.58709
HC108	115.519	eoc	3.57251
HC107	115.621	eoc	1.4871
HC106	115.722	eoc	3.2537
HC105	115.824	eoc	3.59929
HC104	115.926	eoc	3.46533
HC103	116.027	eoc	2.58057
HC102	116.129	eoc	2.35837
HC101	116.23	eoc	3.11518
HC100	117.043	eoc	3.84504
HC099	117.145	eoc	1.68157
HC098	117.246	eoc	1.07592
HC097	117.348	eoc	3.37518
HC096	117.45	eoc	2.52083
HC095	117.551	eoc	3.36294
HC094	117.653	eoc	8.2968
HC093	117.754	eoc	3.6991
HC092	117.856	eoc	2.28423
HC091	117.958	eoc	4.23088
HC090	118.059	eoc	1.90632
HC089	118.161	eoc	2.52226
HC088	118.262	eoc	2.52053
HC087	118.364	eoc	3.94975
HC086	118.466	eoc	1.98329
HC085	118.567	eoc	2.87875
HC084	118.669	eoc	4.48096
HC083	118.77	eoc	7.6002
HC082	118.872	eoc	10.3189
HC081	118.974	eoc	4.58718
HC080	119.075	eoc	10.8013
HC079	119.177	eoc	10.6722
HC078	119.278	eoc	10.5787
HC077	119.38	eoc	8.59714
HC076	119.482	eoc	8.9808
HC075	119.532	eoc	8.23141
HC074	119.583	eoc	8.88733
HC073	119.634	eoc	8.88967
HC072	119.685	eoc	8.25535
HC071	119.736	eoc	7.31535
HC070	119.786	eoc	8.71175
HC069	119.837	eoc	9.59167
HC068	119.888	eoc	9.87254
HC067	119.939	eoc	9.35351
HC066	119.99	eoc	8.57714
HC065	120.04	eoc	10.3846
HC064	120.091	eoc	10.5887
HC063	120.142	eoc	10.6879
HC062	120.193	eoc	10.5978
HC061	120.244	eoc	8.09007
HC060	120.294	eoc	8.11838
HC059	120.345	eoc	7.62994
HC058	120.396	eoc	8.74188
HC057	120.447	eoc	7.64154
HC056	120.498	eoc	7.40657
HC055	120.548	eoc	7.58302
HC054	120.599	eoc	7.47119
HC053	120.65	eoc	11.1565
HC052	120.701	eoc	9.32944
HC051	120.752	eoc	8.25201
HC050	120.802	eoc	8.67822
HC049	120.853	eoc	8.60417
HC048	120.904	eoc	8.31572
HC047	120.955	eoc	8.16685
HC046	121.006	eoc	7.50773
HC045	121.056	eoc	8.43495
HC044	121.107	eoc	8.48872
HC043	121.158	eoc	8.99422
HC042	121.209	eoc	9.09266
HC041	121.26	eoc	9.09016
HC040	121.31	eoc	8.65253
HC039	121.361	eoc	8.63393
HC038	121.412	eoc	9.35621
HC037	121.463	eoc	9.35725
HC036	121.514	eoc	9.1396
HC035	121.564	eoc	11.0263
HC034	121.615	eoc	10.4117
HC033	121.666	eoc	9.28369
HC032	121.717	eoc	11.1639
HC031	121.768	eoc	20.8805
HC030	121.818	eoc	15.8686
HC029	121.869	eoc	10.7367
HC028	121.92	pal	8.74206
HC027	121.971	pal	8.70663
HC026	122.022	pal	8.53558
HC025	122.072	pal	9.16277
HC024	122.123	pal	9.72366
HC023	122.174	pal	8.62765
HC022	122.225	pal	9.1045
HC021	122.276	pal	9.23373
HC020	122.326	pal	8.52249
HC019	122.377	pal	8.97212
HC018	122.428	pal	8.93041
HC017	122.479	pal	8.75152
HC016	122.53	pal	9.33256
HC015	122.631	pal	9.13036
HC014	122.733	pal	9.20853
HC013	122.834	pal	9.52158
HC012	122.936	pal	9.22059
HC011	123.038	pal	8.71495
HC010	123.139	pal	9.48759
HC009	123.241	pal	9.05494
HC008	123.342	pal	9.71963
HC007	123.444	pal	9.45874
HC006	123.546	pal	11.2688
HC005	123.647	pal	10.1805
HC004	123.749	pal	10.0049
HC003	123.85	pal	9.53215
HC002	123.952	pal	7.9965
HC001	124.054	pal	7.02809
