# Supplementary material for: Warming, euxinia and sea level rise during the Paleocene–Eocene Thermal Maximum on the Gulf Coastal Plain: implications for ocean oxygenation and nutrient cycling
Source: Copernicus journal article supplement (doi:10.5194/cp-10-1421-2014), 2014-07-25
Supplement: Supplementary file 2 [file cp-10-1421-2014-supplement.zip]

## Supplement to:

“Warming, euxinia and sea level rise during the Paleocene-Eocene Thermal Maximum on the Gulf Coastal Plain: implications for ocean oxygenation and nutrient cycling” by Appy Sluijs, Linda van Roij, Guy J. Harrington, Stefan Schouten, Jocelyn A. Sessa, Leah J. LeVay, Gert-Jan Reichart, and Caroline P. Slomp. The supplement comprises this PDF file and Tables S1 and S2 in excel format.

**1. Raw data** All raw data are provided in Table S1.

## 2. Dinocyst Taxonomical section

### 2.1 *Apectodinium*

We recorded many specimens of *Apectodinium* that only differed from the above species by having aculeate process tips, reminding of *Wetzeliiella astra* (Plate A). For specific morphotypes, this feature was used to define the species *Apectodinium cornufruticosum* (Islam, 1983). We have seen this feature in all of the reported *Apectodinium* species at Harrell suggesting it represent phenotypic plasticity rather than a species-specific feature.

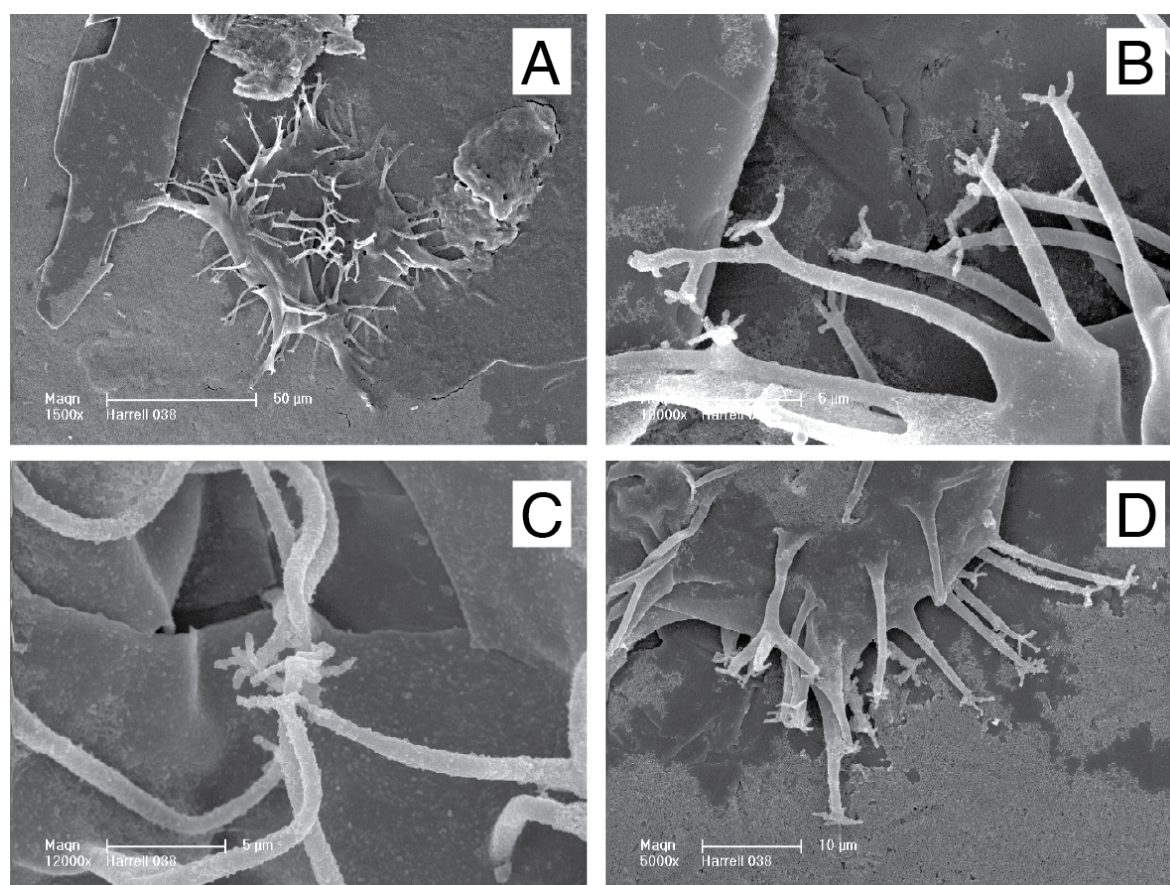

**Plate A.** Scanning electron microscope photos of *Apectodinium* specimens showing aculeate process tips. All specimens are from sample 141.21 mbs. A-B. *A. quinquelatum*, C-D *A. hyperacanthum*.

## 2.2 Encountered dinocyst species

We follow taxonomic concepts of Fensome and Williams (2004) unless stated otherwise.

*Achomosphaera* spp.  
*Adnatosphaeridium* spp.  
*Apectodinium homomorphum*  
*Apectodinium hyperacanthum*  
*Apectodinium quinquelatum*  
*Apectodinium parvum*  
*Apectodinium* spp. (pars).  
*Areoligera coronata*  
*Areoligera* spp. (pars.)  
*Cerebrocysta* spp.  
*Cleistosphaeridium* spp.  
*Cordosphaeridium fibrospinosum* cpx. *sensu* Sluijs and Brinkhuis (2009)  
*Cribooperidinium* spp  
*Deflandrea* spp.  
*Dinogymnium* spp.  
*Diphyes colligerum*  
*Eocladopyxis peniculata*  
*Eocladopyxis* spp. (pars.)  
*Fibrocysta* spp.  
*Florentinia reichartii* Sluijs and Brinkhuis (2009)  
*Glaphyrocysta* spp.  
*Hystrichosphaeridium tubiferum*  
*Hystrichokolpoma* spp  
*Kenleyia* spp.  
*Lanternosphaeridium lanosum*  
*Membranosphaera* spp.  
*Muratodinium fimbriatum*  
*Operculodinium israelianum*  
*Operculodinium severinii*  
*Operculodinium* spp. (pars.)  
*Paleotetradinium* spp.  
*Phthanoperidinium* spp.  
*Polysphaeridium* spp.  
*Pyxidinopsis* spp.  
*Senegalinium* spp.  
*Senegalinium* cpx. *sensu* Sluijs and Brinkhuis (2009)  
*Spinidinium densispinatum*  
*Spiniferites* spp.  
*Spiniferites* cpx. *sensu* Sluijs and Brinkhuis (2009)

### 3. Nature and source of data supporting Figure 6

Site numbers in Figure 6 correspond to the site numbers in Table S2. The table provides information on the types of data used from the literature (references provided) to suggest deoxygenation of the sea floor and water column at the various sites. Moreover, it provides references to the papers that have presented quantitative information on sea surface and continental warming, sediment supply, sea level and atmospheric nitrogen fixation. References to papers in Table S2 are included below.

### References

- Aleksandrova, G. N., and Radionova, E. P.: On the late Paleocene stratigraphy of the Saratov Volga Region: Micropaleontological characteristics of the Kamyshin Formation, Dyupa Gully section, *Paleontological Journal*, 40, 543-557, 2006.
- Bak, K.: Deep-water agglutinated foraminiferal changes across the Cretaceous/Tertiary and Paleocene/Eocene transitions in the deep flysch environment: eastern outer Carpathians (Boieszczy Mts, Poland), in: *Proceedings of the 6th International Workshop on Agglutinated Foraminifera*, Grzybowski Foundation Special Publication v. 8, 1-56, 2005.
- Bolle, M.-P., Pardo, A., Hinrichs, K.-U., Adatte, T., von Salis, K., Burns, S., Keller, G., and Muzylyev, N.: The Paleocene-Eocene transition in the marginal northeastern Tethys (Kazakhstan and Uzbekistan), *International Journal of Earth Sciences*, 89, 390-414, 2000.
- Boltovskoy, E., Watanabe, S., Totah, V. I., and Vera Ocampo, J.: Cenozoic benthic bathyal foraminiferas of DSDP Site 548 (North Atlantic), *Micropaleontology*, 38, 183-207, 1992.
- Braga, G., De Biase, R., Grunig, A., and Proto Decima, F.: Foraminiferi Bentonici del Paleocene e dell'Eocene della Sezione di Possagno, in: *Monografia Micropaleontologica sul Paleocene e l'Eocene di Possagno*, Prov. di Treviso, Italia, edited by: Bolli, H. M., *Schweizerische Palaeontologische Abhandlungen* v. 97, 85-111, 1975.
- Bralower, T. J., Thomas, D. J., Zachos, J. C., Hirschmann, M. M., Röhl, U., Sigurdsson, H., Thomas, E., and Whitney, D. L.: High-resolution records of the late Paleocene thermal maximum and circum-Caribbean volcanism: Is there a causal link?, *Geology*, 25, 963-966, 1997.
- Canudo, J., Keller, G., Molina, E., and Ortiz, N.: Planktic foraminiferal turnover and  $\delta^{13}\text{C}$  isotopes across the Paleocene-Eocene transition at Caravaca and Zumaya, Spain, *Palaeogeography, Palaeoclimatology, Palaeoecology*, 114, 75-100, 1995.
- Chun, C. O. J., Delaney, M. L., and Zachos, J. C.: Paleoredox changes across the Paleocene-Eocene thermal maximum, Walvis Ridge (ODP Sites 1262, 1263, and 1266): Evidence from Mn and U enrichment factors, *Paleoceanography*, 25, PA4202, 2010.
- Colosimo, A. B., Bralower, T. J., and Zachos, J. C.: Evidence for lysocline shoaling at the Paleocene/Eocene Thermal Maximum on Shatsky Rise, northwest Pacific., in: *Proceedings of the Ocean Drilling Program, Scientific Results 198*, edited by: Bralower, T. J., Premoli Silva, I., and Malone, M. J., Ocean Drilling Program, College Station, Texas., 1-36, 2005.
- Cramer, B. S., Aubry, M.-P., Miller, K. G., Olsson, R. K., Wright, J. D., and Kent, D. V.: An exceptional chronologic, isotopic, and clay mineralogic record of the latest Paleocene thermal maximum, Bass River, NJ, ODP 174AX, *Bulletin de la Société Géologique de France*, 170, 883-897, 1999.
- Crouch, E. M., and Brinkhuis, H.: Environmental change across the Paleocene-Eocene transition from eastern New Zealand: A marine palynological approach, *Marine Micropaleontology*, 56, 138-160, 2005.
- Cui, Y., Kump, L. R., Ridgwell, A. J., Charles, A. J., Junium, C. K., Diefendorf, A. F., Freeman, K. H., Urban, N. M., and Harding, I. C.: Slow release of fossil carbon during the Palaeocene-Eocene Thermal Maximum, *Nature Geoscience*, 4, 481-485, 2011.
- Dickson, A. J., Cohen, A. S., and Coe, A. L.: Seawater oxygenation during the Paleocene-Eocene Thermal Maximum, *Geology*, 40, 639-642, 2012.
- Dupuis, C., Aubry, M.-P., Steurbaut, E., Berggren, W. A., Ouda, K., Magioncalda, R., Cramer, B. S., Kent, D. V., Speijer, R. P., and Heilmann-Clausen, C.: The Dababiya Quarry Section: Lithostratigraphy, clay mineralogy, geochemistry and paleontology, *Micropaleontology*, 49, 41-59, 2003.

- Dypvik, H., Riber, L., Burca, F., R  ther, D., Jargvoll, D., Nagy, J., and Jochmann, M.: The Paleocene-Eocene thermal maximum (PETM) in Svalbard -- clay mineral and geochemical signals, *Palaeogeography, Palaeoclimatology, Palaeoecology*, 302, 156-169, 2011.
- Egger, H., Fenner, J., Heilmann-Clausen, C., R  gl, F., Sachsenhofer, R., and Schmitz, B.: Paleoproductivity of the northwestern Tethyan margin (Anthering section, Austria) across the Paleocene-Eocene transition, in: *Causes and Consequences of Globally Warm Climates in the Early Paleogene*, Geological Society of America Special Paper 369, edited by: Wing, S. L., Gingerich, P. D., Schmitz, B., and Thomas, E., Geological Society of America, Bolder, Colorado, 133-146, 2003.
- Egger, H., Homayoun, M., Huber, H., Rogl, F., and Schmitz, B.: Early Eocene climatic, volcanic, and biotic events in the northwestern Tethyan Untersberg section, Austria, *Palaeogeography, Palaeoclimatology, Palaeoecology*, 217, 243-264, 2005.
- Ernst, S. R., Guasti, E., Dupuis, C., and Speijer, R. P.: Environmental perturbation in the southern Tethys across the Paleocene/Eocene boundary (Dababiya, Egypt): Foraminiferal and clay mineral records, *Marine Micropaleontology*, 60, 89-111, 2006.
- Expedition 302 Scientists, X.: Sites M0001-M0004, in: *Proceedings of the Integrated Ocean Drilling Program*, 302, edited by: Backman, J., Moran, K., McInroy, D. B., Mayer, L. A., and the Expedition 302 Scientists, Integrated Ocean Drilling Program Management International, Inc., Edinburgh, 2006.
- Fensome, R. A., and Williams, G. L.: The Lentin and Williams Index of Fossil Dinoflagellates 2004 Edition, American Association of Stratigraphic Palynologists (AASP) Contribution Series 42, 909 pp., 2004.
- Fricke, H. C., and Wing, S. L.: Oxygen isotope and paleobotanical estimates of temperature and  $\delta^{18}\text{O}$ -latitude gradients over North America during the early Eocene, *American Journal of Science*, 304, 612-635, 2004.
- Frieling, J., Iakovleva, A.I., Reichart, G.J., Aleksandrova, G.N., Gnibidenko, Z.N., Schouten, S., Sluijs, A., Paleocene - Eocene warming and biotic response in the epicontinental West Siberian Sea, doi: 10.1130/G35724.1, in press.
- Gavrilov, Y., Shcherbinina, E. A., and Oberh  nsli, H.: Paleocene-Eocene boundary events in the northeastern Peri-Tethys, in: *Causes and Consequences of Globally Warm Climates in the Early Paleogene*. Geological Society of America Special Paper 369, edited by: Wing, S. L., Gingerich, P. D., Schmitz, B., and Thomas, E., Geological Society of America, Bolder, Colorado, 147-168, 2003.
- Gavrilov, Y. O., Kodina, L. A., Lubchenko, I. Y., and Muzylov, N. G.: The Late Paleocene anoxic event in epicontinental seas of Peri-Tethys and formation of the sapropelite unit: Sedimentology and geochemistry, *Lithology and Mineral Resources*, 5, 492-517, 1997.
- Giusberti, L., Rio, D., Agnini, C., Backman, J., Fornaciari, E., Tateo, F., and Oddone, M.: Mode and tempo of the Paleocene-Eocene thermal maximum in an expanded section from the Venetian pre-Alps, *Geological Society of America Bulletin*, 119, 391-412, 2007.
- Gradstein, F. M., Kaminski, M. A., Berggren, W. A., Kristiansen, I. L., and D'loro, M. A.: Cenozoic biostratigraphy of the North Sea and Labrador Shelf, *Micropaleontology*, 40 Supplement, 152, 1994.
- Harding, I. C., Charles, A. J., Marshall, J. E. A., P  like, H., Roberts, A. P., Wilson, P. A., Jarvis, E., Thorne, R., Morris, E., Moremon, R., Pearce, R. B., and Akbari, S.: Sea-level and salinity fluctuations during the Paleocene-Eocene thermal maximum in Arctic Spitsbergen, *Earth and Planetary Science Letters*, 303, 97-107, 2011.
- Harris, A. D., Miller, K. G., Browning, J. V., Sugarman, P. J., Olsson, R. K., Cramer, B. S., and Wright, J. D.: Integrated stratigraphic studies of Paleocene-lowermost Eocene sequences, New Jersey Coastal Plain: Evidence for glacioeustatic control, *Paleoceanography*, 25, PA3211, 2010.
- Hollis, C. J., Field, B. D., Jones, C. M., Strong, C. P., Wilson, G. J., and Dickens, G. R.: Biostratigraphy and carbon isotope stratigraphy of uppermost Cretaceous-lower Cenozoic Muzzle Group in middle Clarence valley, New Zealand, *Journal of the Royal Society of New Zealand*, 35, 345-383, 2005.
- Iakovleva, A. I., Brinkhuis, H., and Cavagnetto, C.: Late Palaeocene-Early Eocene dinoflagellate cysts from the Turgay Strait, Kazakhstan; correlations across ancient seaways, *Palaeogeography, Palaeoclimatology, Palaeoecology*, 172, 243-268, 2001.
- Islam, M. A.: Dinoflagellate cysts from the Eocene of the London and the Hampshire Basins, Southern England, *Palynology*, 7, 71-92, 1983.
- John, C. M., Bohaty, S. M., Zachos, J. C., Sluijs, A., Gibbs, S. J., Brinkhuis, H., and Bralower, T. J.: North American continental margin records of the Paleocene-Eocene thermal maximum: Implications for global carbon and hydrological cycling, *Paleoceanography*, 23, PA2217, 2008.
- Kaiho, K.: Uppermost Cretaceous to Palogene bathyal benthic foraminiferal biostratigraphy of Japan and New Zealand: Latest Paleocene-middle Eocene benthic turnover, *Revue de Pal  obiologie, Special Volume*, 2, 553-559, 1988.

- Kaiho, K., Arinobu, T., Ishiwatari, R., Morgans, H. E. G., Okada, H., Takeda, N., Tazaki, K., Zhou, G., Kajiwara, Y., Matsumoto, R., Hirai, A., Niitsuma, N., and Wada, H.: Latest Paleocene benthic foraminiferal extinction and environmental change at Tawanui, New Zealand, *Paleoceanography*, 11, 447-465, 1996.
- Kaiho, K., Takeda, K., Petrizzo, M. R., and Zachos, J. C.: Anomalous shifts in tropical Pacific planktonic and benthic foraminiferal test size during the Paleocene-Eocene thermal maximum, *Palaeogeography, Palaeoclimatology, Palaeoecology*, 237, 456-464, 2006.
- Kennett, J. P., and Stott, L. D.: Abrupt deep-sea warming, palaeoceanographic changes and benthic extinctions at the end of the Palaeocene, *Nature*, 353, 225-229, 1991.
- Knox, R. W. O. B., Aubry, M.-P., Berggren, W. A., Dupuis, C., Ou, K., Magioncalda, R., and Soliman, M.: The Area section at Gebel Abu Had: Lithostratigraphy, clay mineralogy, geochemistry and biostratigraphy, *Micropaleontology*, 49 (Supplement 1), 93-104, 2003.
- Kodina, L. A., Huang, Y., Gavrillov, Y. O., Jones, M. R., and Edglington, G.: Environment of upper Paleocene black shale deposition in southern Russia and adjacent regions as revealed by isotope and biomarker study, in: *Organic geochemistry: Developments and applications to energy, climate, environment and human history*, edited by: Grimalt, J. O., and Dorronsoro, C., Selected papers from the 17th International Meeting on Organic Geochemistry, Donostia-San Sebastian, The Basque Country, 408 September, 192-194, 1995.
- Kopp, R. E., Raub, T. D., Schumann, D., Vali, H., Smirnov, A. V., and Kirschvink, J. L.: Magnetofossil spike during the Paleocene-Eocene thermal maximum: Ferromagnetic resonance, rock magnetic, and electron microscopy evidence from Ancora, New Jersey, United States, *Paleoceanography*, 22, PA4103, 2007.
- Kopp, R. E., Schumann, D., Raub, T. D., Powars, D. S., Godfrey, L. V., Swanson-Hysell, N. L., Maloof, A. C., and Vali, H.: An Appalachian Amazon? Magnetofossil evidence for the development of a tropical river-like system in the mid-Atlantic United States during the Paleocene-Eocene thermal maximum, *Paleoceanography*, 24, PA4211, 2009.
- Kozdon, R., Kelly, D. C., Kita, N. T., Fournelle, J. H., and Valley, J. W.: Planktonic foraminiferal oxygen isotope analysis by ion microprobe technique suggests warm tropical sea surface temperatures during the Early Paleogene, *Paleoceanography*, 26, PA3206, 2011.
- Lippert, P. C., and Zachos, J. C.: A biogenic origin for anomalous fine-grained magnetic material at the Paleocene-Eocene boundary at Wilson Lake, New Jersey, *Paleoceanography*, 22, PA4104, 2007.
- Lu, G., and Keller, G.: The Paleocene-Eocene transition in the Antarctic Indian Ocean: Inference from planktic foraminifera, *Marine Micropaleontology*, 21, 101-142, 1993.
- Nagy, J., Jargvoll, D., Dypvik, H., Jochmann, M., and Riber, L.: Environmental changes during the Paleocene–Eocene Thermal Maximum in Spitsbergen as reflected by benthic foraminifera, *Polar Research*, 2013.
- Nicolo, M. J., Dickens, G. R., and Hollis, C. J.: South Pacific intermediate water oxygen depletion at the onset of the Paleocene-Eocene Thermal Maximum as depicted in New Zealand margin sections, *Paleoceanography*, 25, PA4210, 2010.
- Nomura, R., and Takata, H.: Data report: Paleocene/Eocene benthic foraminifers, ODP Leg 199 Sites 1215, 1220, and 1221, equatorial central Pacific Ocean, in: *Proceedings of the Ocean Drilling Program, Scientific Results 199*, edited by: Wilson, P. A., Lyle, M., and Firth, J. V., Ocean Drilling Program, College Station, TX, 1-34, 2005.
- Pak, D. K., and Miller, K. G.: Paleocene to Eocene benthic foraminiferal isotopes and assemblages: Implications for deep water circulation, *Paleoceanography*, 7, 405-422, 1992.
- Pälike, C., Delaney, M. L., and Zachos, J. C.: Deep sea redox across the Paleocene-Eocene thermal maximum, *Geochemistry, Geophysics, Geosystems*, in press.
- Pardo, A., Keller, G., Molina, E., and Canudo, J.: Planktic foraminiferal turnover across the Paleocene-Eocene transition at DSDP Site 401, Bay of Biscay, North Atlantic, *Marine Micropaleontology*, 29, 129-158, 1997.
- Rodriguez-Tovar, F. J., Uchman, A., Alegret, L., and Molina, E.: Impact of the Paleocene-Eocene Thermal Maximum on the macrobenthic community: Ichnological record from the Zumaia section, northern Spain, *Marine Geology*, 282, 178-187, 2011.
- Schmitz, B., and Pujalte, V.: Sea-level, humidity, and land-erosion records across the initial Eocene thermal maximum from a continental-marine transect in northern Spain, *Geology*, 31, 689-692, 2003.
- Schoon, P. L.: Impact of CO<sub>2</sub> and pH on the distribution and stable carbon isotopic composition of microbial biomarker lipids, PhD, Earth Sciences, University of Utrecht, Utrecht University, 185 pp., 2013.
- Schulte, P., Scheibner, C., and Speijer, R. P.: Fluvial discharge and sea-level changes controlling black shale deposition during the Paleocene–Eocene Thermal Maximum in the Dababiya Quarry section, Egypt, *Chemical Geology*, 285, 167-183, 2011.
- Shipboard Scientific Party, X.: Site 1220. *Proceedings of the Ocean Drilling Program, Initial Reports 199*, in: edited by: Lyle, M., Wilson, P. A., and Janecek, T. R., Ocean Drilling Program, College Station, TX, 2002.

- Sluijs, A., Schouten, S., Pagani, M., Woltering, M., Brinkhuis, H., Sinninghe Damsté, J. S., Dickens, G. R., Huber, M., Reichart, G.-J., Stein, R., Matthiessen, J., Lourens, L. J., Pedentchouk, N., Backman, J., Moran, K., and the Expedition 302 Scientists: Subtropical Arctic Ocean temperatures during the Palaeocene/Eocene thermal maximum, *Nature*, 441, 610-613, 2006.
- Sluijs, A., Brinkhuis, H., Schouten, S., Bohaty, S. M., John, C. M., Zachos, J. C., Reichart, G.-J., Sinninghe Damsté, J. S., Crouch, E. M., and Dickens, G. R.: Environmental precursors to light carbon input at the Paleocene/Eocene boundary, *Nature*, 450, 1218-1221, 2007.
- Sluijs, A., Röhl, U., Schouten, S., Brumsack, H.-J., Sangiorgi, F., Sinninghe Damsté, J. S., and Brinkhuis, H.: Arctic late Paleocene–early Eocene paleoenvironments with special emphasis on the Paleocene-Eocene thermal maximum (Lomonosov Ridge, Integrated Ocean Drilling Program Expedition 302), *Paleoceanography*, 23, PA1S11, 2008.
- Sluijs, A., and Brinkhuis, H.: A dynamic climate and ecosystem state during the Paleocene-Eocene Thermal Maximum: inferences from dinoflagellate cyst assemblages on the New Jersey Shelf, *Biogeosciences*, 6, 1755-1781, 2009.
- Sluijs, A., Bijl, P. K., Schouten, S., Röhl, U., Reichart, G.-J., and Brinkhuis, H.: Southern Ocean warming, sea level and hydrological change during the Paleocene-Eocene thermal maximum, *Climate of the Past*, 7, 47-61, 2011.
- Speijer, R. P., and Schmitz, B.: A benthic foraminiferal record of Paleocene sea level and trophic/redox conditions at Gebel Aweina, Egypt, *Palaeogeography, Palaeoclimatology, Palaeoecology*, 137, 79-101, 1998.
- Speijer, R. P., and Wagner, T.: Sea-level changes and black shales associated with the late Paleocene thermal maximum: Organic-geochemical and micropaleontologic evidence from the southern Tethyan margin (Egypt-Israel), *Geological Society of America Special Paper*, 356, 533-549, 2002.
- Stassen, P., Dupuis, C., Steurbaut, E., Yans, J., and Speijer, R. P.: Perturbation of a Tethyan coastal environment during the Paleocene-Eocene thermal maximum in Tunisia (Sidi Nasseur and Wadi Mezaz), *Palaeogeography, Palaeoclimatology, Palaeoecology*, 317-318, 66-92, 2012a.
- Stassen, P., Thomas, E., and Speijer, R. P.: Integrated stratigraphy of the Paleocene-Eocene thermal maximum in the New Jersey Coastal Plain: Toward understanding the effects of global warming in a shelf environment, *Paleoceanography*, 27, PA4210, 2012b.
- Stein, R., Boucsein, B., and Meyer, H.: Anoxia and high primary production in the Paleogene central Arctic Ocean: First detailed records from Lomonosov Ridge, *Geophysical Research Letters*, 33, L18606, 2006.
- Takeda, K., and Kaiho, K.: Faunal turnovers in central Pacific benthic foraminifera during the Paleocene-Eocene thermal maximum, *Palaeogeography, Palaeoclimatology, Palaeoecology*, 251, 175-197, 2007.
- Thomas, D. J., Bralower, T. J., and Zachos, J. C.: New evidence for subtropical warming during the late Paleocene thermal maximum: Stable isotopes from Deep Sea Drilling Project Site 527, Walvis Ridge, *Paleoceanography*, 14, 561-570, 1999.
- Thomas, E., and Shackleton, N. J.: The Palaeocene-Eocene benthic foraminiferal extinction and stable isotope anomalies., in: *Correlation of the Early Paleogene in Northwestern Europe*, Geological Society London Special Publication, 101, edited by: Knox, R. W. O. B., Corfield, R. M., and Dunay, R. E., Geological Society of London, London, United Kingdom, 401-441, 1996.
- Thomas, E.: Biogeography of the late Paleocene benthic foraminiferal extinction, in: *Late Paleocene-early Eocene climatic and biotic events in the marine and terrestrial records*, edited by: Aubry, M.-P., Lucas, S. G., and Berggren, W. A., Columbia University Press, New York, 214-243, 1998.
- Thomas, E.: Interactive comment on “Extreme warming, photic zone euxinia and sea level rise during the Paleocene/Eocene Thermal Maximum on the Gulf of Mexico Coastal Plain; connecting marginal marine biotic signals, nutrient cycling and ocean deoxygenation” by A. Sluijs et al., *Climate of the Past Discussions*, 9, C2797-C2799, 2013.
- Weijers, J. W. H., Schouten, S., Sluijs, A., Brinkhuis, H., and Sinninghe Damsté, J. S.: Warm arctic continents during the Palaeocene-Eocene thermal maximum, *Earth and Planetary Science Letters*, 261, 230-238, 2007.
- Wing, S. L., Harrington, G. J., Smith, F. A., Bloch, J. I., Boyer, D. M., and Freeman, K. H.: Transient Floral Change and Rapid Global Warming at the Paleocene-Eocene Boundary, *Science*, 310, 993-996, 2005.
- Winguth, A. M. E., Thomas, E., and Winguth, C.: Global decline in ocean ventilation, oxygenation, and productivity during the Paleocene-Eocene Thermal Maximum: Implications for the benthic extinction, *Geology*, 40, 263-266, 2012.
- Zachos, J. C., Wara, M. W., Bohaty, S., Delaney, M. L., Petrizzo, M. R., Brill, A., Bralower, T. J., and Premoli Silva, I.: A transient rise in tropical sea surface temperature during the Paleocene-Eocene thermal maximum, *Science*, 302, 1551-1554, 2003.

Zachos, J. C., Schouten, S., Bohaty, S., Quattlebaum, T., Sluijs, A., Brinkhuis, H., Gibbs, S., and Bralower, T. J.: Extreme warming of mid-latitude coastal ocean during the Paleocene-Eocene Thermal Maximum: Inferences from TEX<sub>86</sub> and Isotope Data, *Geology*, 34, 737-740, 2006.
