# Supplementary material for: Warming, euxinia and sea level rise during the Paleocene–Eocene Thermal Maximum on the Gulf Coastal Plain: implications for ocean oxygenation and nutrient cycling
Source: Copernicus journal article supplement (doi:10.5194/cp-10-1421-2014), 2014-07-25
Supplement: Supplementary file 2 [file Table S2. PETM data compilation.xlsx]

## Sheet: PETM data compilation
	Nature and Source of Data in Figure 6
	Region	Site nr	Site	Paleo waterdepth (m)	Evidence for O2 decline	photic zone euxinia	deoxygenation reference	Warming sea surface	Warming continent	Sea Level Rise	Sediment Supply	N2	Remarks
	North America	1	Harrell Core, Gulf Coastal Plain	shelf		isorenieratane	this paper	this paper	this paper	this paper			seasonally anoxic sea floor
		2	Wilson Lake, New Jersey Shelf	shelf	magnetotactic bacterial grains		Lippert and Zachos 2007	Zachos et al. 2006		Sluijs et al. 2008	John et al. 2008		sea floor suboxic; perhaps seasonally anoxic
					Benthic Foraminifers		Stassen et al. 2012b
		3	Ancora, New Jersey Shelf	shelf	magnetotactic bacterial grains		Kopp et al. 2007			Harris et al. 2010	Kopp et al. 2009		sea floor suboxic; perhaps seasonally anoxic
					Benthic Foraminifers		Stassen et al. 2012b
		4	Bass River, New Jersey Shelf	shelf	Benthic Foraminifers		Stassen et al. 2012b	Cramer et al. 1999		Sluijs et al. 2008	John et al. 2008		sea floor suboxic; perhaps seasonally anoxic
					microlaminations		Sluijs personal observation	Sluijs et al. 2007		Harris et al. 2010	John et al. 2008
		5	Lodo Gulch, California	shelf							John et al. 2008
		6	Tumey Gulch, California	shelf-slope							John et al. 2008
		7	Bighorn Basin, Wyoming	continental					Fricke and Wing, 2004
									Wing et al. 2005
	Artcic Ocean	8	IODP Site M0004, Lomonosov Ridge	shelf	trace metal enrichments		Sluijs et al. 2008	Sluijs et al. 2006	Weijers et al. 2007	Sluijs et al. 2006	Sluijs et al. 2008	Knies et al. 2008	(seasonally) anoxic/euxinic sea floor
						isorenieratane	Sluijs et al. 2006
					C/S ratios		Stein et al. 2006
					laminations		Sluijs et al. 2006
					Pyrite		Expedition 302 Scientists, 2006
					Mo isotopes		Dickson et al. 2012
		9	Longyearbyen, Spitsbergen	shelf	laminations		Harding et al. 2011			Harding et al. 2011	Harding et al. 2011		(seasonally) anoxic/euxinic sea floor
					pyrite		Harding et al. 2011
		10	BH9-05, Spitsbergen	shelf	laminations		Cui et al. 2011			Dypvik et al. 2011			(seasonally) anoxic/euxinic sea floor
					pyrite		Cui et al. 2011
					U enrichment		Dypvik et al. 2011
					Benthic Foraminifers		Nagy et al. 2013
	Eurasian shelves and seas	11	Central Basin, North Sea	shelf	laminations		Sluijs personal observation						hypoxic/anoxic sea floor
					Benthic Foraminifers		Winguth et al. 2012 based on Gradstein et al., 1994
		12	Denmark, North Sea	shelf		isorenieratane	Schoon 2013						(seasonally) anoxic/euxinic sea floor
		13	Woensdrecht, North Sea	shelf						Sluijs et al. 2008
		14	Doel/Kallo, North Sea	shelf						Sluijs et al. 2008
		15	DSDP Site 548, North Atlantic	deep	Benthic Foraminifers		Winguth et al. 2012 based on Boltovskoy et al. 1992
		16	DSDP Site 401, Bay of Biscay	deep 2000	OMZ expansion; thermocline forams		Pardo et al. 1997						suboxic sea floor
					Benthic Foraminifers		Winguth et al. 2011 based on Pak and Miller, 1992
					Mn and U enrichment factors		Pälike et al. In press
		17	Zumaia, Spain	slope/rise	ichnofossils		Rodríguez-Tovar et al. 2011				Schmitz et al. 2003		dysaerobic sea floor
		18	Ermua, Spain	slope							Schmitz et al. 2003
		19	Caravaca, Spain	slope 200-600	laminations		Canudo et al. 1995						hypoxic sea floor
		20	Alamedilla, Spain	slope/rise
		21	Possagno, Italy	deep	Benthic Foraminifers		Winguth et al. 2012 based on Braga et al. 1975
		22	Forada, Italy	rise/deep							Giusberti et al. 2007
		23	Anthering, Austria	rise	toc enrichment		Egger et al. 2003
		24	Untersberg, Austria	rise	toc enrichment		Egger et al. 2005
		25	Bieszczady Mountains, Poland	rise	Benthic Foraminifers		Winguth et al. 2012 based on Bak, 2005
		26	Dyuba Section, Russia	epicontinental shelf						Aleksandrova and Radionova, 2006
		27	Sokolovski Quarry, Turgay Straight, Russia	epicontinental shelf						Iakovleva et al. 2001
		28	Well 10, West Siberian Sea	epicontinental shelf	TOC enrichment	isorenieratane	Frieling et al. In press	Frieling et al. In press					seasonally/intermittently anoxic sea floor
		29	Medani, Georgia	epicontinental shelf	trace metal enrichments		Gavrilov et al. 1997; 2003			Gavrilov et al. 2003			(seasonally) anoxic sea floor
		30	Kheu River, Central Caucasus	epicontinental shelf	trace metal enrichments		Gavrilov et al. 1997; 2003			Gavrilov et al. 2003			(seasonally) anoxic sea floor
		31	Kaurtakapy, Khazakstan	epicontinental shelf	Pyrite		Gavrilov et al. 1997; 2003			Gavrilov et al. 2003			(seasonally) anoxic sea floor
		32	Aktumsuk, Uzbekistan	epicontinental shelf	trace metal enrichments		Gavrilov et al. 1997; 2003			Bolle et al. 2000			(seasonally) anoxic sea floor
					Pyrite		Bolle et al. 2000			Gavrilov et al. 2003
					Lycopane		Bolle et al. 2000
					laminations		Gavrilov et al. 2003
		33	Torangly, Turkmenistan	epicontinental shelf	trace metal enrichments		Gavrilov et al. 1997; 2003			Gavrilov et al. 2003			(seasonally) anoxic sea floor
		34	Kurpai / Guru Fatima, Tadjik depression	epicontinental shelf	trace metal enrichments		Gavrilov et al. 1997; 2003			Gavrilov et al. 2003			(seasonally) anoxic sea floor
						biomarkers of Chlorobium'	Gavrilov et al. 2003 based on Kodina et al. 1995						(seasonally) anoxic/euxinic; Data not in peer-reviewed literature
	North African margin	35	Sidi Nasseur / Wadi Mezaz, Tunisia	shelf	Benthic Foraminifers		Stassen et al. 2012a						suboxic/dysoxic
		36	Gebel Awaina, Egypt	shelf	Benthic Foraminifers		Speijer and Wagner 2003						seasonally anoxic and suboxic or dysoxic
					laminations		Speijer and Schmitz 1998
		37	Dababiya, Egypt	shelf	trace metal enrichments		Schulte et al. 2011						anoxic / euxinic sea floor
					Benthic Foraminifers		Ernst et al. 2006
					laminations		Dupuis et al. 2003
					pyrite		Dupuis et al. 2003
		38	Gebel Duwi, Egypt	shelf	Benthic Foraminifers		Speijer and Wagner 2003						seasonally anoxic and suboxic/dysoxic
		39	Gebel Nezzi, Egypt	shelf	Benthic Foraminifers		Speijer and Wagner 2003						seasonally anoxic and suboxic/dysoxic
		40	Gebel Qreiya, Egypt	shelf	Benthic Foraminifers		Speijer and Wagner 2003						seasonally anoxic and suboxic/dysoxic
					trace metal enrichments		Knox et al. 2003; Soliman 2003
					laminations, pyrite		Knox et al. 2003; Soliman 2003
		41	Wadi Nukhl, Egypt	shelf	Benthic Foraminifers		Speijer and Wagner 2003						seasonally anoxic and suboxic/dysoxic
		42	Ben Gurion, Israel	shelf	Benthic Foraminifers		Speijer and Wagner 2003						seasonally anoxic and suboxic/dysoxic
	Southwest Pacific margins	43	Mead Stream, New Zealand	slope 100-1000	laminations/minimum bioturbation		Nicolo et al. 2010				Hollis et al. 2005		hypoxic sea floor
		44	Dee Stream, New Zealand	slope 100-1000	laminations/minimum bioturbation		Nicolo et al. 2010				Hollis et al. 2005		hypoxic sea floor
		45	Muzzle Stream, New Zealand	slope 100-1000							Hollis et al. 2005
		46	Tawanui, New Zealand	slope	Benthic Foraminifers		Kaiho et al. 1996						suboxic sea floor
										Crouch and Brinkhuis 2005, Sluijs et al. 2008
		47	Kumara, New Zealand	shelf						Sluijs et al. 2008
		48	East Tasman Plateau	shelf				Sluijs et al. 2011		Sluijs et al. 2011
	Deep Pacific	49	Hokkaido Tokachi district	deep (?)	Benthic Foraminifers		Winguth et al. 2012 based on Kaiho, 1988
		50	ODP Site 1209, Shatsky Rise; Central Pacific	deep 2000	Pyrite		Colosimo et al. 2005	Zachos et al. 2003					Palike et al in press conclude 1209 remained oxic
					Benthic Foraminifers		Kaiho et al. 2006; Takeda and Kaiho, 2011						foraminifer deoxygenation evidence questioned (Pälike et al. In press)
		51	ODP Site 1210, Shatsky Rise; Central Pacific	deep 2200	Pyrite		Colosimo et al. 2005
					Benthic Foraminifers		Kaiho et al. 2006; Takeda and Kaiho, 2011
		52	ODP Site 1212, Shatsky Rise; Central Pacific	deep 2300	Pyrite		Colosimo et al. 2005
					Benthic Foraminifers		Takeda and Kaiho, 2011
		53	ODP Site 1211, Shatsky Rise; Central Pacific	deep 2500	Pyrite		Colosimo et al. 2005
					Benthic Foraminifers		Takeda and Kaiho, 2011
		54	ODP Site 865, Central Pacific	deep 1100-1300	Benthic Foraminifers		Thomas 1998	Kozdon et al. 2011
		55	ODP Site 1220, Central Pacific	deep 3200	laminations		Shipboard Scientific Party 2002						Chun et al in press conclude sister site 1221 remained oxic
					Benthic Foraminifers		Winguth et al. 2012 based on Nomura and Takata, 2005
	Deep Atlantic	56	ODP Site 999, Carribean	deep 1500-2500	laminations		Bralower et al. 1997						hypoxic sea floor
		57	ODP Site 1001, Carribean	deep 1500-2500	laminations / absence of bioturbation		Bralower et al. 1997						hypoxic sea floor
		58	ODP Site 1258, Demerara Rise	deep 3000?	Mn and U enrichment factors		Pälike et al. In press						suboxic throughout; possible decrease during PETM
		59	ODP Site 1260, Demerara Rise	deep 2500?	laminations		Shipboard Scientific Party 2002						hypoxic sea floor
		60	ODP Site 1262, Walvis Ridge	deep 3600	Mn and U enrichment factors		Chun et al. 2010						suboxic sea floor
		61	DSDP Site 527, Walvis Ridge	deep 3100				Thomas et al. 1999
		62	ODP Site 1266, Walvis Ridge	deep 2600	Mn and U enrichment factors		Chun et al. 2010						suboxic sea floor
		63	ODP Site 1263, Walvis Ridge	deep 1500	Mn and U enrichment factors		Chun et al. 2010						suboxic sea floor
	Southern Ocean	64	ODP Site 689, Maud Rise	deep 1100	Benthic Foraminifers		Thomas and Shackleton 1996; Thomas 1998	Zachos et al. 2007					suboxic; foraminifer O2 evidence questioned (Thomas, 2014)
		65	ODP Site 690, Maud Rise	deep 1800	Benthic Foraminifers		Thomas and Shackleton 1996; Thomas 1998	Kennett and Stott. 1991					suboxic; foraminifer O2 evidence questioned (Thomas, 2014)
					Mn and U enrichment factors		Pälike et al. In press
		66	ODP Site 738	deep 1300	OMZ expansion; thermocline forams		Lu and Keller 1993						suboxic sea floor
					Benthic Foraminifers		Winguth et al. 2012 based on Thomas, unpublished
					Mn and U enrichment factors		Pälike et al. In press
